# Supplementary material for: Spontaneous and self-oriented growth during chemical vapor epitaxy of single-crystalline MoS2
Source: Research Square preprint supplement (doi:10.21203/rs.3.rs-7114151/v1), 2025-08-05
Supplement: Supplementary file 1 [file b322cea67259ee5881703412.pdf]

## SUPPLEMENTARY INFORMATION

### Spontaneous and self-oriented growth during chemical vapor epitaxy of single-crystalline MoS<sub>2</sub>

Iryna Kandybka<sup>1,2</sup>, Pawan Kumar<sup>2\*</sup>, Henry Medina Silva<sup>2\*</sup>, Benjamin Groven<sup>2</sup>, Ankit Nalin Mehta<sup>2</sup>, Yuanyuan Shi<sup>2,▲</sup>, Quentin Smets<sup>2</sup>, Tom Schram<sup>2</sup>, Sreetama Banerjee<sup>2</sup>, Cesar Javier Lockhart de la Rosa<sup>2</sup>, Gouri Sankar Kar<sup>2</sup>, Pierre Morin<sup>2</sup>, Annelies Delabie<sup>2,1\*</sup>

<sup>1</sup>Department of Chemistry KU Leuven, Celestijnenlaan 200F, Leuven, 3001, Belgium

<sup>2</sup>imec, Kapeldreef 75, Leuven, 3001, Belgium

Current address ▲ School of Microelectronics, University of Science and Technology of China (USTC), Jinzhai Road 96, Hefei, 230026, China

E-mail: [Pawan.Kumar@imec.be](mailto:Pawan.Kumar@imec.be); [Henry.MedinaSilva@imec.be](mailto:Henry.MedinaSilva@imec.be); [Annelies.Delabie@imec.be](mailto:Annelies.Delabie@imec.be)

---

#### Note 1: MOCVD of MoS<sub>2</sub> from Mo(CO)<sub>6</sub> and H<sub>2</sub>S

---

At the deposition temperature of 1000 °C, H<sub>2</sub>S decomposes in the gas phase through the reversible reaction  $\text{H}_2\text{S} \rightleftharpoons \text{H}_2 + \text{S}$  (Reaction 1).<sup>1</sup> H<sub>2</sub>S and sulfur from the gas phase can adsorb on the surface, forming an S adatom. On the other hand, Mo(CO)<sub>6</sub> decomposes in the gas phase at the temperatures exceeding 250 °C, forming a Mo atom and carbonyl by-products.<sup>2</sup> Mo can react with H<sub>2</sub>S (or S) in the gas phase, resulting in MoS<sub>2</sub>. Alternatively, the generated Mo atom can adsorb on the surface, forming a Mo adatom. Both S and Mo adatoms can diffuse over the surface and aggregate with other adatoms to form nuclei or aggregate with already formed MoS<sub>2</sub> crystals. Sulfur adatoms can also desorb from the growth surface, diffuse in the gas phase, and adsorb again. In contrast, the desorption of Mo adatoms in this system has a low probability even at 1000 °C.<sup>3</sup> As a result, the deposition proceeds in mass transport limited regime, and precursor delivery rate of Mo determines the metal adsorption and diffusion kinetics on the surface (**Figure 3b**). Due to the much higher concentration of supplied S compared to Mo precursor species, MoS<sub>2</sub> growth rate and nucleation density is primarily governed by the adsorption and diffusion kinetics of the metal ad-species (**Figure S2**).

The adsorption rate can be defined as  $R_{\text{ads}} = S \cdot F$  (Reaction 2), where S is a sticking coefficient, and F is a precursor flux. For the Mo atoms adsorbing on the sapphire surface, the sticking coefficient can be considered a constant, ignoring adsorption on MoS<sub>2</sub> crystals in the initial growth stage. Then, the

adsorption rate of Mo atoms is determined by the flux of Mo atoms to the surface, which in turn is controlled by the metal concentration in the chamber. Thus, a higher Mo concentration in the gas phase leads to a higher adsorption rate, more Mo adatoms on the surface and, therefore, higher deposition rate, consistent with Figure 2a and b.

Following classical nucleation theory, higher partial pressure of the metal precursor leads to the lower potential barrier for the heterogeneous nucleation.<sup>4</sup> Additionally, the higher metal concentration increases the probability of gas phase and surface aggregation, contributing to the higher areal density of MoS<sub>2</sub> crystals (Figure 3d). When Mo(CO)<sub>6</sub> concentration increases from 0.1 to 1.0 ppm, the maximal areal density of MoS<sub>2</sub> crystals also increases from 3.5·10<sup>2</sup> to 1.2·10<sup>3</sup> crystals/μm<sup>2</sup>, respectively. As a result, the interdomain distance between crystals in the steady state decreases from 56 to 29 nm when Mo(CO)<sub>6</sub> concentration increases from 0.1 to 1.0, respectively.

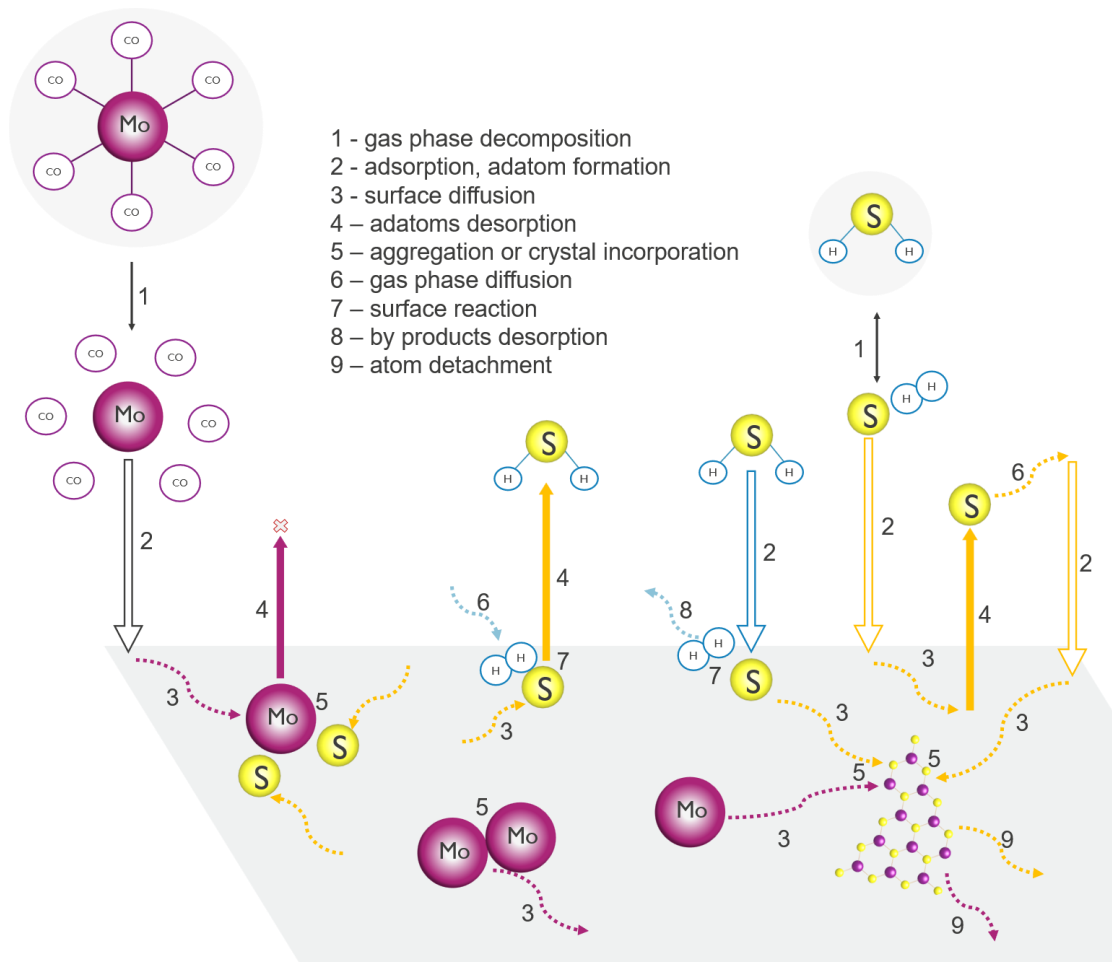

**Figure S1.** A schematic depicting the main processes occurring during MoS<sub>2</sub> CVD from Mo(CO)<sub>6</sub> and H<sub>2</sub>S indicates the irreversible adsorption of Mo on the template's surface.



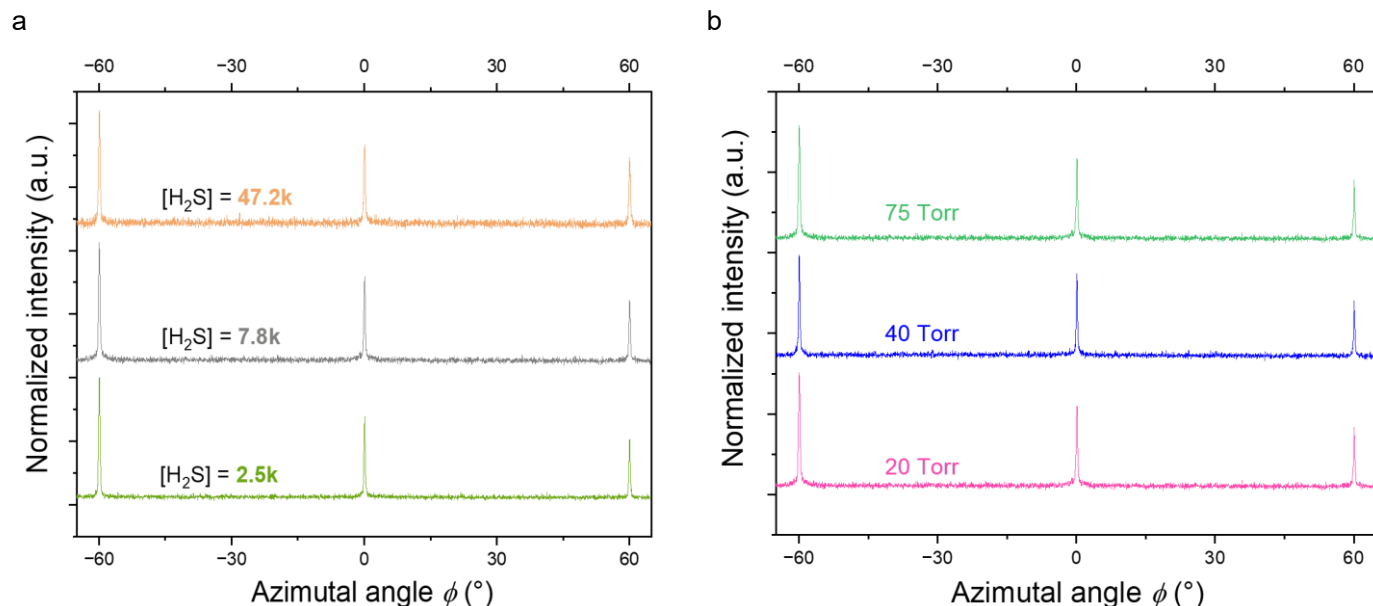

**Figure S4.** For MoS<sub>2</sub> crystals deposited with 0.6 ppm of Mo(CO)<sub>6</sub>, we modify the total pressure in the chamber and the H<sub>2</sub>S precursor concentration, keeping all the other process parameters the same. Changes in sulfur precursor concentration (a) and total pressure (b) do not affect the MoS<sub>2</sub> monolayer properties from an in-plane GI-XRD perspective.

---

#### Note 2: Bimodal MoS<sub>2</sub> crystal size distribution

---

A non-uniform crystal size distribution is characteristic for the MoS<sub>2</sub> crystals. At a higher metal precursor molar concentration of 1.0 ppm, the MoS<sub>2</sub> crystals exhibit a high areal density and begin to coalesce quickly during the deposition process, making it difficult to study the evolution of crystal size. At lower metal precursor concentrations, the deposition process is slower, allowing the evolution of crystal size to be investigated (**Figure S5**). In the initial growth stage, two peaks in the crystal size distribution are present: the small crystals peak ( $S_{\text{crystal}}$ ) and the large crystals peak ( $L_{\text{crystal}}$ ). On one hand, the  $L_{\text{crystal}}$  peak shifts to the right during the deposition process, indicating a further increase in the size of large crystals. On the other hand, the  $S_{\text{crystal}}$  peak remains in the same position and does not change with deposition time. Interestingly, at the lowest metal precursor concentration of 0.1 ppm, where the growth of the MoS<sub>2</sub> domains is slow enough, a size gap between the large and small crystals is observed as deposition time increases. Thus, the small crystals on average do not grow beyond the critical size of 25-35 nm and are present throughout the deposition process.

The observed bimodality in MoS<sub>2</sub> crystallite sizes suggests three possible scenarios during crystal growth, depending on the relative kinetics of atom attachment, detachment, and adatom diffusion. In the first scenario, most of the stable nuclei form at the beginning of the deposition process, some grow faster,

81 forming the large crystals, while others remain small. In this case, the small crystals continuously attach,  
 82 release and exchange atoms through a surface-mediated process with the larger crystals, contributing to  
 83 their growth. Simultaneously, the small crystals do not exceed their critical size. In the second scenario,  
 84 the small crystals undergo constant consumption by giving away all of their atoms and then regenerating  
 85 (renucleation). Lastly in the third scenario, the small crystals are not present during the deposition process  
 86 itself but form during the cooling down stage from Mo adatoms on the surface when the temperature  
 87 begins to decrease, limiting the diffusion length of those adatoms. In all proposed scenarios, the large  
 88 crystals are the main constitutive part of the MoS<sub>2</sub> monolayer, establishing its properties.

89

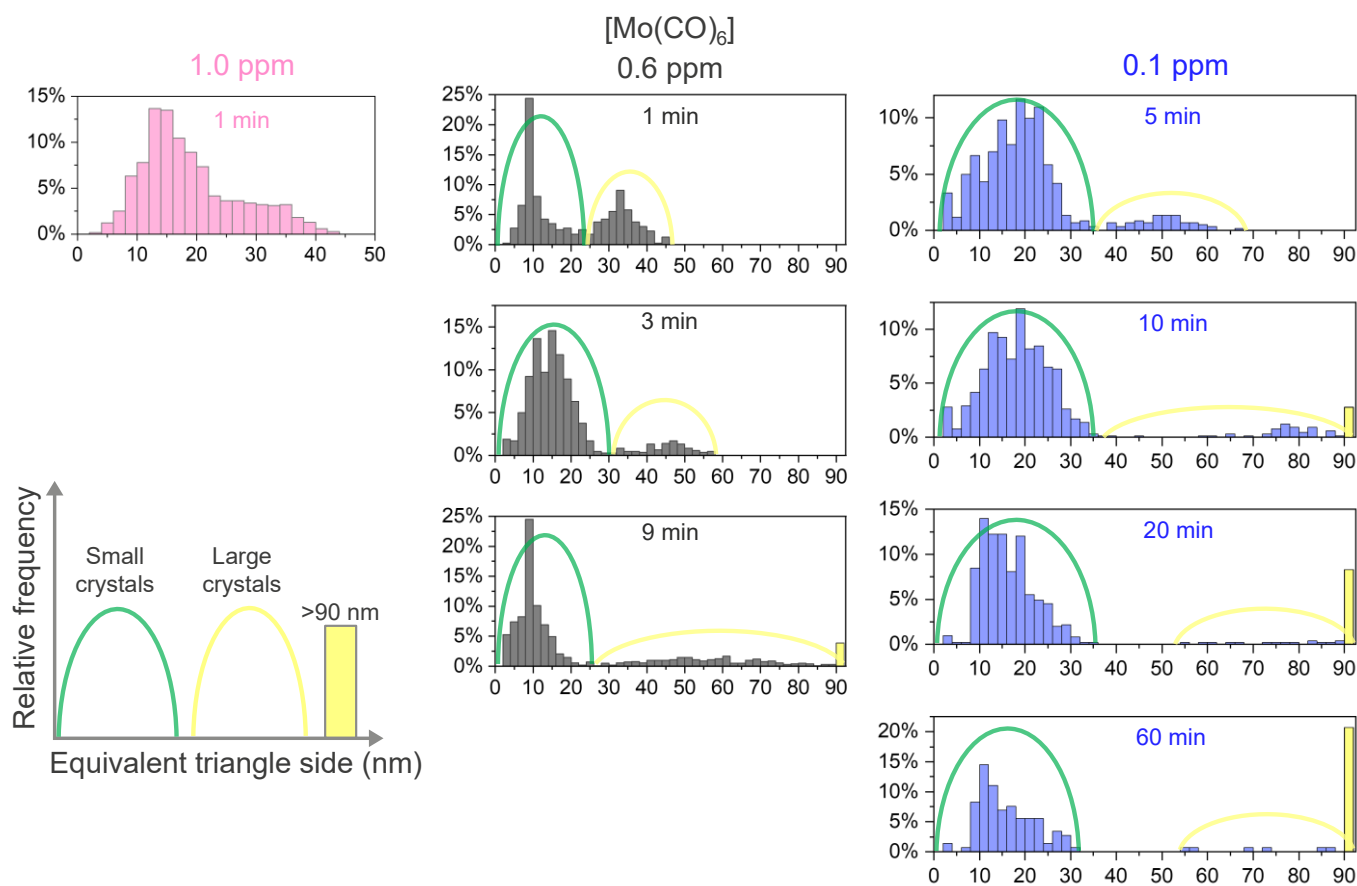

90

91 **Figure S5.** The bimodal MoS<sub>2</sub> crystal size distribution during the deposition process for Mo(CO)<sub>6</sub> concentration of 0.6  
 92 ppm and 0.1 ppm.

93

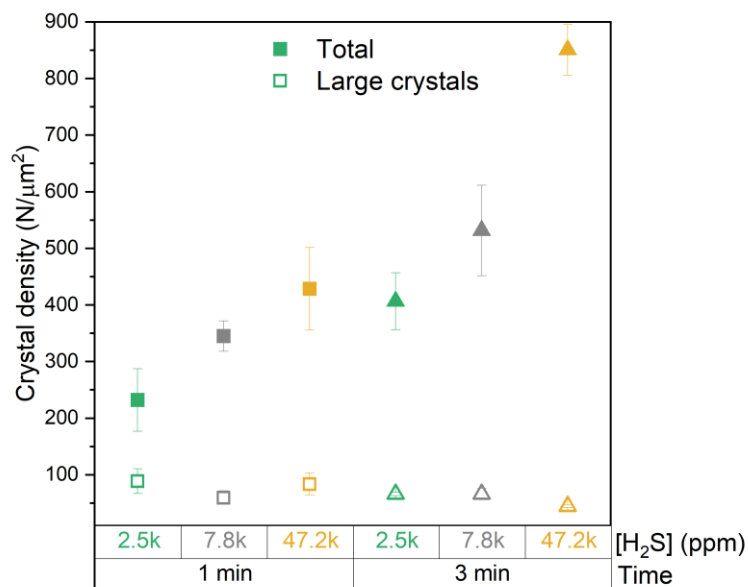

**Figure S6.** The MoS<sub>2</sub> crystal density increases early in the deposition process with the increase of the H<sub>2</sub>S concentration, when deposited with 0.6 ppm of Mo(CO)<sub>6</sub>. We hypothesize that interaction of H<sub>2</sub>S/H<sub>2</sub> molecules with the sapphire substrate leads to surface defects formation. Around these surface defects, the nucleation probability of MoS<sub>2</sub> increases. However, the nucleation density increase is observed only for the small crystals, while the density of large crystals with an equivalent triangle side above 25-35 nm stays approximately the same. As the larger crystals dominate later in the deposition process, the closed MoS<sub>2</sub> monolayers free of misoriented domains, as confirmed by in plane GI-XRD (Figure S4).

I04 The ambient environment significantly influences the reconstruction behavior of the sapphire surface  
I05 (**Figure S7a**). When the substrate is annealed in an inert nitrogen ( $N_2$ ) or hydrogen ( $H_2$ ) environment at  
I06  $1000^\circ\text{C}$  for 30 minutes, only a slight change from the original surface morphology is observed. However,  
I07 when annealing is performed in a hydrogen sulfide ( $H_2S$ ) environment, a much more pronounced  
I08 coalescence of terraces occurs, resulting in larger, more uniform surface areas. Interestingly, when the  
I09  $Mo(CO)_6$  precursor is added to  $H_2S$  atmosphere during MOCVD and  $MoS_2$  deposition is initiated, the  
I10 sapphire surface modification proceeds differently compared to just the  $H_2S$  atmosphere. This indicates a  
I11 coupled effect: on the one hand, the sapphire bulk crystallographic symmetry guides the  $MoS_2$  orientation  
I12 through van der Waals interactions, on the other hand, the growing  $MoS_2$  crystals affects the way the  
I13 sapphire surface reconstructs.

I14 On the other hand, the orientation of isolated  $MoS_2$  crystallites remains unchanged when the sapphire  
I15 surface is pre-annealed in  $H_2S$ , indicating that potential sulfur-induced surface passivation does not  
I16 influence the epitaxial alignment of  $MoS_2$  crystals (Figure S7b).



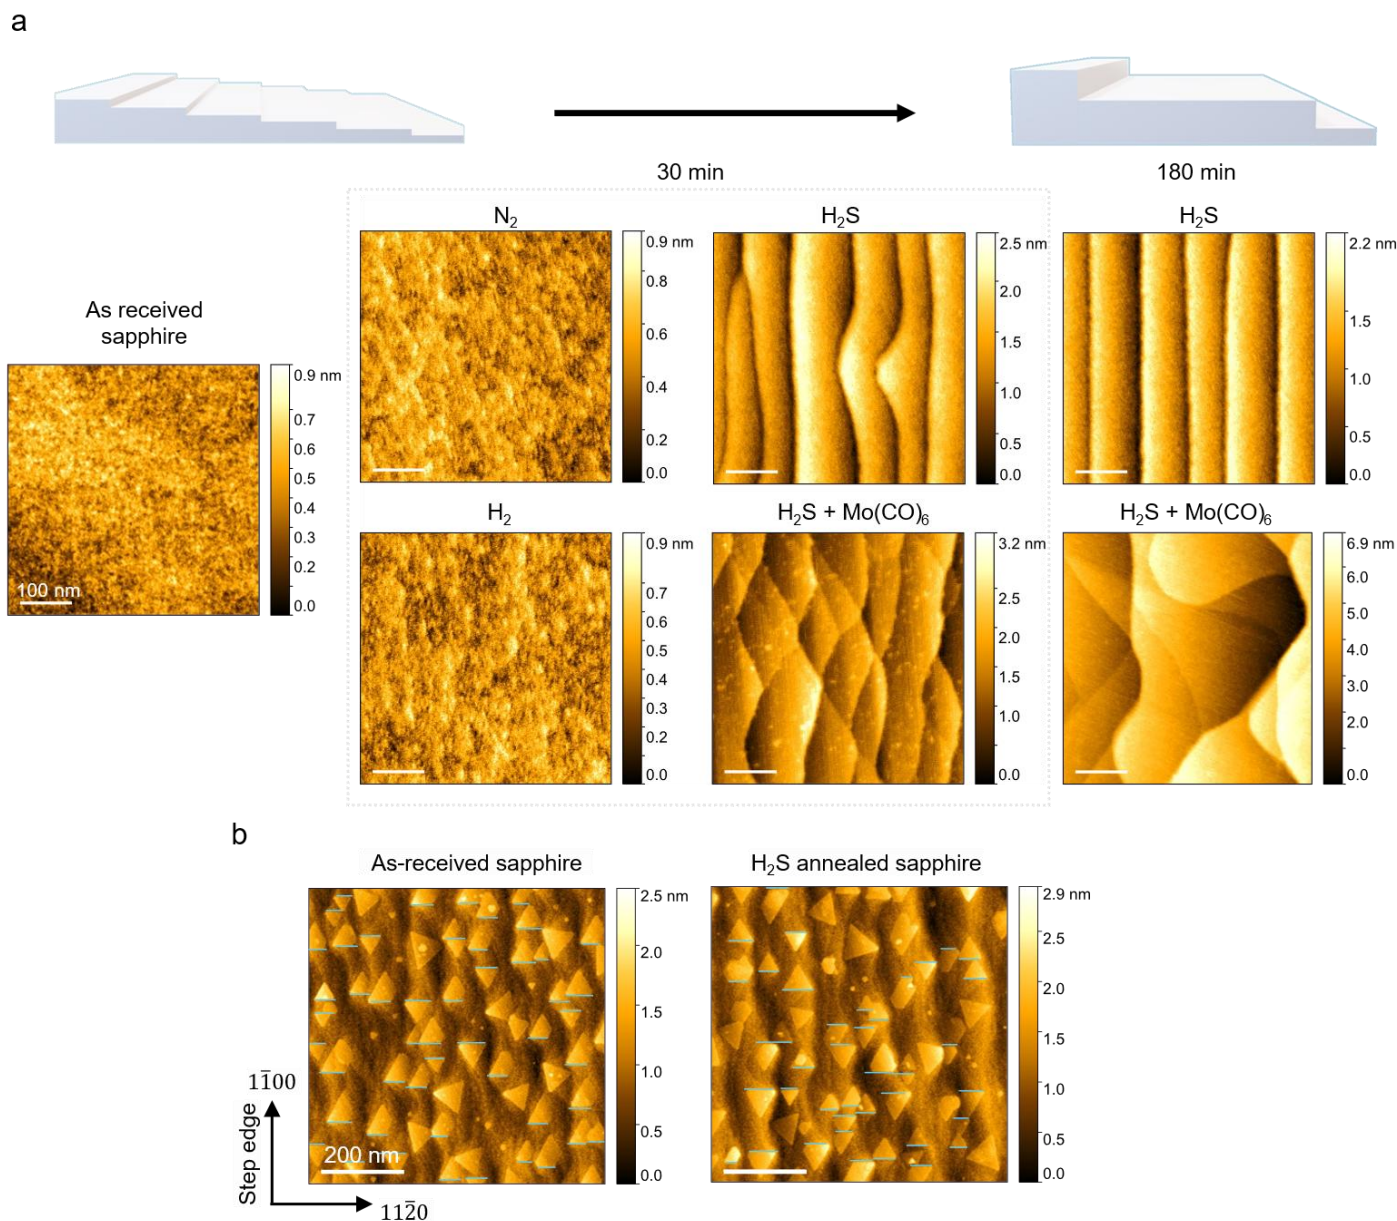

**Figure S7. a**, Changes of the sapphire surface depend on the chemicals present in the chamber during pretreatment at 1000 °C, as revealed by atomic force microscopy (AFM) images. For  $H_2S + Mo(CO)_6$ ,  $MoS_2$  is deposited on top of the sapphire surface and transferred prior to AFM imaging. **b**, The orientation of  $MoS_2$  crystals is the same for as-received and  $H_2S$ -treated (30 min, 0.1 slm) sapphire. The deposition time is 30 minutes with 0.6 ppm of  $Mo(CO)_6$ .



The presence of steps on the sapphire surface can affect the shape of MoS<sub>2</sub> crystals. The steps on sapphire surface with the step edge along the [1-100] crystallographic direction can be generated when the off-cut direction is the [11-20] A-axis. For the R0° epitaxial relationship between the sapphire c-plane and the MoS<sub>2</sub> crystals, the triangular crystals are oriented perpendicular to the step edge. If the terrace width is much shorter than the diffusion length of the metal adatoms on the surface, anisotropic diffusion can be initiated.<sup>5</sup> Here, we use off-A axis cut sapphire with a 1° off-axis cut angle and an initial terrace width of 12.4 nm, which further increases due to step coalescence. As a result, the MoS<sub>2</sub> crystals deposited with a metal precursor concentration of 0.1 ppm demonstrate anisotropic development of crystal facets, as we reported previously (**Figure S8a**)<sup>5</sup>. The crystal shape changes from triangular to diamond in a slow, step-by-step process, as depicted in Figure S3a. When the metal precursor concentration increases to 0.6 ppm, MoS<sub>2</sub> crystals shape follows the same anisotropic growth pathway as MoS<sub>2</sub> crystals at 0.1 ppm. However, at 0.6 ppm, different stages of crystal development coexist simultaneously, in contrast to step-by-step evolution observed at the lower metal precursor concentration (Figure S8b). Here, the higher adsorption rate causes the non-homogeneous distribution of metal adatoms on the surface. These adatoms exhibit anisotropic surface diffusion because of the steps present on the surface and sapphire surface reconstruction. As a result, facets of different crystals develop at varying speeds, as indicated by the different stages of shape evolution. When the metal concentration is further increased to 1.0 ppm, crystal coalescence starts very early in the deposition process because of high nucleation density, and no change in MoS<sub>2</sub> crystal shape is observed (Figure S8c).

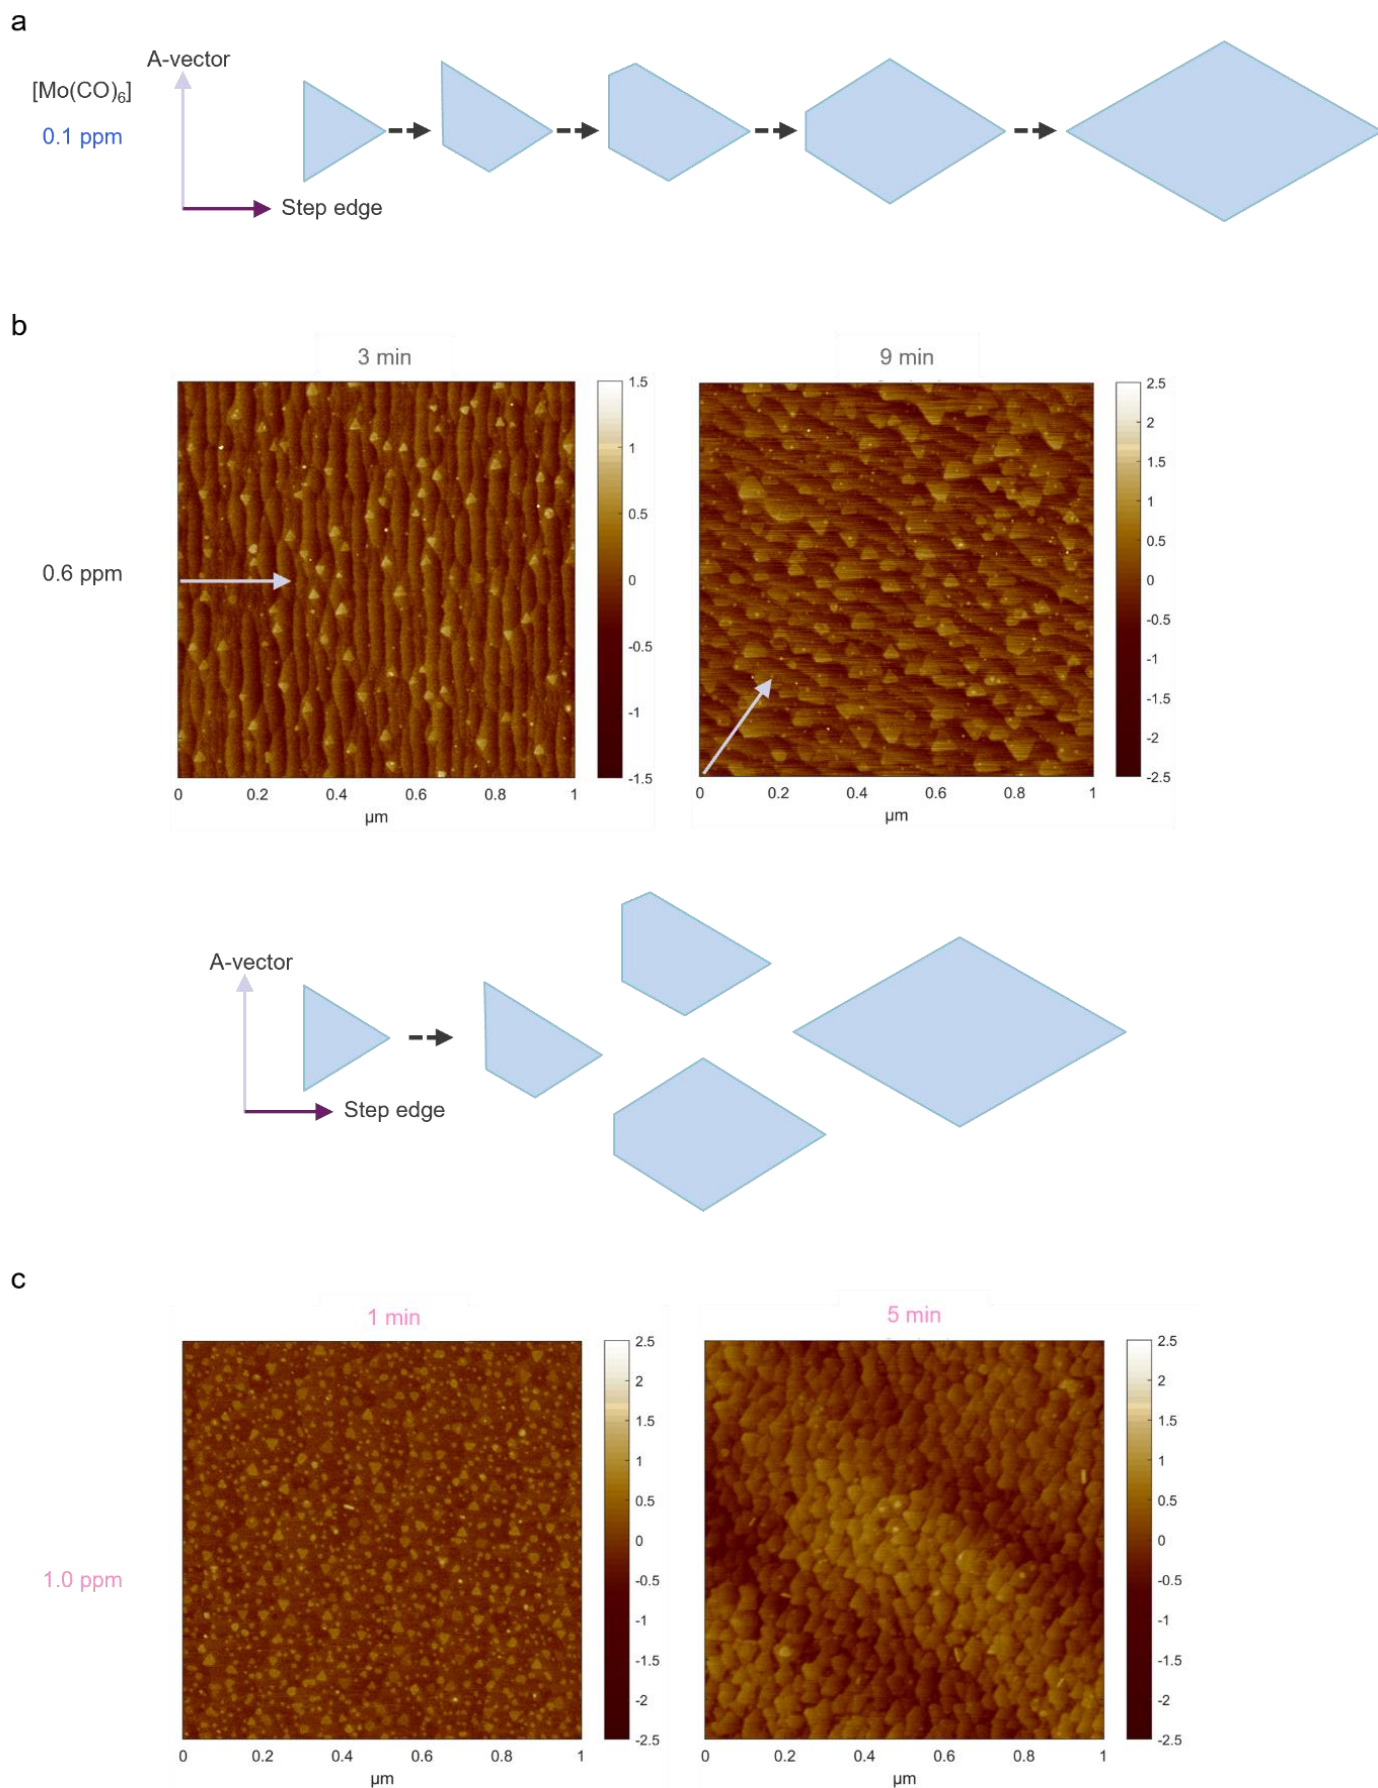

**Figure S8.** Schematic and AFM images of MoS<sub>2</sub> crystal shape evolution during MOCVD. The orientation of the A vector [11-20] is indicated by an arrow on the AFM images. **a**, Slow, step by step shape evolution at the lowest metal precursor concentration of 0.1 ppm. **b**, The different stages of crystal shape evolution coexist when the metal

precursor concentration is increased to 0.6 ppm. c, Crystal shape does not change at the higher metal precursor concentration of 1.0 ppm due to fast coalescence of the crystals.

---

Note 5. Recrystallization in multi-domain growth regime

---

The reduction of misoriented domains is a critical factor for optimizing performance and expanding the practical applications of 2D TMDs. The described van der Waals recrystallization process is highly beneficial to improve the crystallinity of the deposited MoS<sub>2</sub> monolayers, however, the energy required to recrystallize the misoriented domains depends on the structure of the formed grain boundaries. Following our experimental observations, effective 60° to 0° domains recrystallization during post deposition annealing (PDA) is possible in the MoS<sub>2</sub> monolayers, where the area of the 60° domains is below ≈ 20% upon the coalescence and the number of misoriented domains is below 1%. The β and γ grain boundary between the twin domains can be eliminated by one Mo or two S planes gliding, whereas a more complex mechanism is required to restore the high angle grain boundaries formed by the intermediate misoriented orientation towards the 0° orientation. In the case of the MoS<sub>2</sub> domains with the intermediate orientations, higher energy might be required to initiate the van der Waals recrystallization process, similar to the 3D materials recrystallization.<sup>6</sup> As a result, MoS<sub>2</sub> monolayers with the higher content of the misoriented domains (deposited with 1.0 and 1.3 ppm of Mo (CO)<sub>6</sub>) do not recrystallize completely to the single-crystalline monolayer after 10 minutes recrystallization process (Figure 4a).

The extra energy for the van der Waals recrystallization of the intermediate oriented domains can be given by prolonged recrystallization time. Indeed, the misoriented domains coverage decreases from 40% to 15% when increasing the PDA time from 10 to 15 minutes (**Figure S9**). Moreover, the improved crystallinity of the MoS<sub>2</sub> monolayer after longer PDA is indicated by the sharpened GI-XRD peak along [11-20] direction (Figure S9d). The full width at half maximum (FWHM) of the peak decreases from 1.1 to 0.4 when the recrystallization time increases from 10 to 15 minutes, respectively. Furthermore, high-resolution scanning TEM (HR-STEM) confirms the presence of the remaining misoriented domains with the relative orientations of 15°, 20°, and 35° after 10 and 15 minutes of the PDA (Figure S9e, f, respectively). Thus, minimizing the number of misoriented domains before the layer coalescence is crucial to promote effective van der Waals recrystallization of those domains and to enable the self-oriented growth regime.

When optical spectroscopy is employed, the room temperature photoluminescence (RT-PL) response of MoS<sub>2</sub> monolayer grown in multi-domain regime shows significant differences between measurements taken under vacuum and those taken under non-vacuum conditions (**Figure S17b**). This suggests that the

removal of physisorbed species from the numerous defect sites reduces the excitonic responses under vacuum. Additionally, the defectivity of multi-domain MoS<sub>2</sub> was analyzed using three shorter recrystallization times (5-15 minutes) to assess the impact associated with the reduction of grain boundaries. This effect was also observed in the GI-XRD and DF-TEM responses (Figure S9c, d). A drastic improvement was noted in the ratio of integrated excitonic responses ( $I_{XD}$  vs  $I_{XA}$ ) in cryogenic PL measurements when the recrystallization time was increased from 5 to 15 minutes (Figure S10a). The extracted defectivity index decreased from 9.4 to 5.8, and ultimately to 0.8, for the intervals of 5, 10, and 15 minutes of recrystallization processing time, respectively (Figure S10b). This improvement in the optical defectivity may be attributed to the reduced density of grain boundaries in the material after the recrystallization process. Despite the drastic improvement in the crystallinity of MoS<sub>2</sub> with the increasing recrystallization time, Raman derived strain/charge doping map demonstrates the slight change of the stain and the charge doping of the monolayer, similar to the single-crystalline MoS<sub>2</sub>. This result indicates the role of the sapphire template/MoS<sub>2</sub> interaction on the Raman spectra.

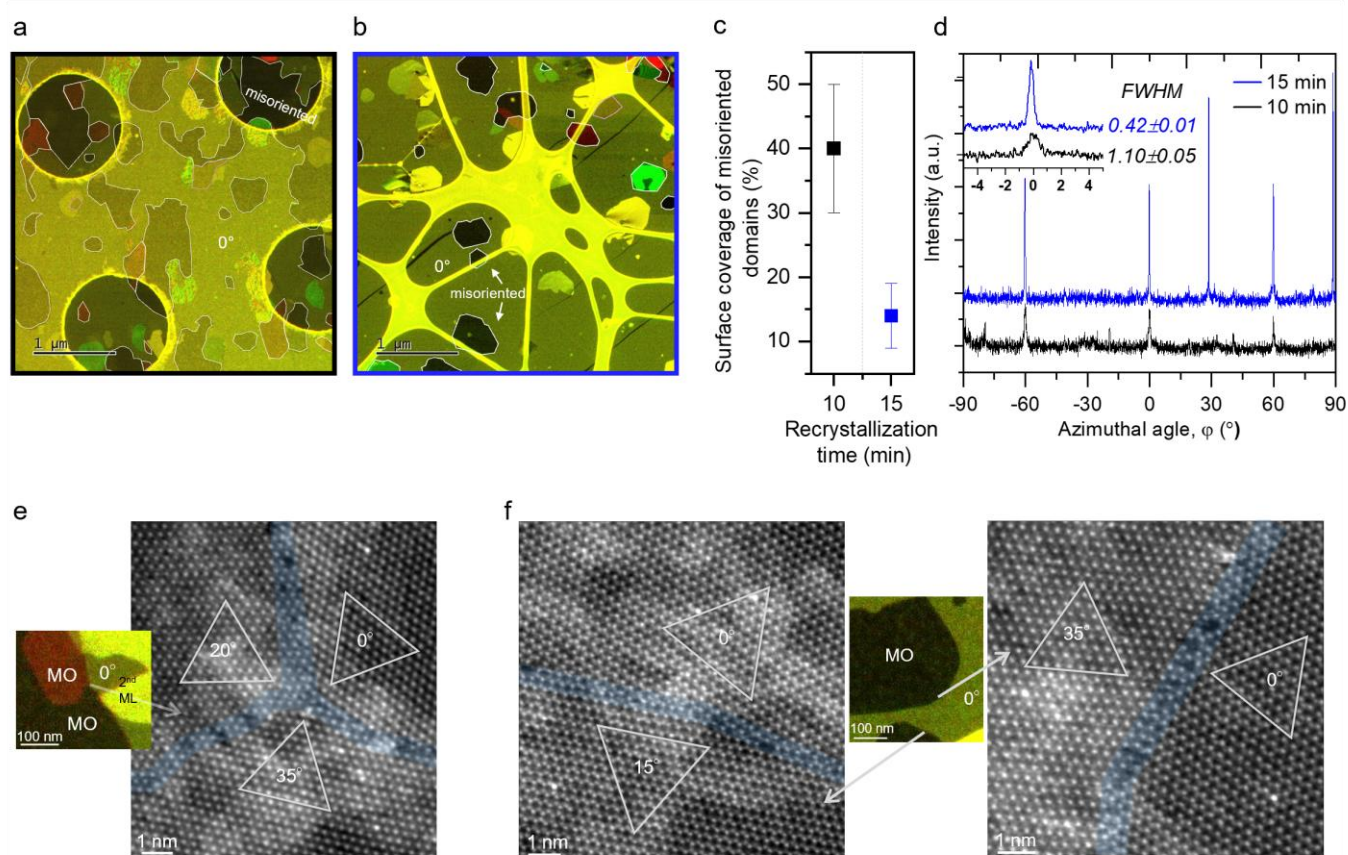

**Figure S9.** **a, b**, TEM images with false colors demonstrate the positive effect of prolonged PDA when the MoS<sub>2</sub> monolayer has a high number of misoriented domains. In the MoS<sub>2</sub> monolayer deposited with 1.0 ppm of Mo(CO)<sub>6</sub>, after 10 minutes PDA, around 40% of the first monolayer consists of the misoriented (60° and intermediate) domains. **c**, The surface coverage of the misoriented domains decreases to 10% when PDA time increases from 10 to 15 minutes. **e, f**, HR-STEM images highlight the boundary area between the misoriented domains with relative 15°, 20°, 35°.

199 and 35° rotation after 10 (e) and 15 (f) minutes of recrystallization. The composite TEM image shows the large field  
 200 of view of the inspected areas.

201

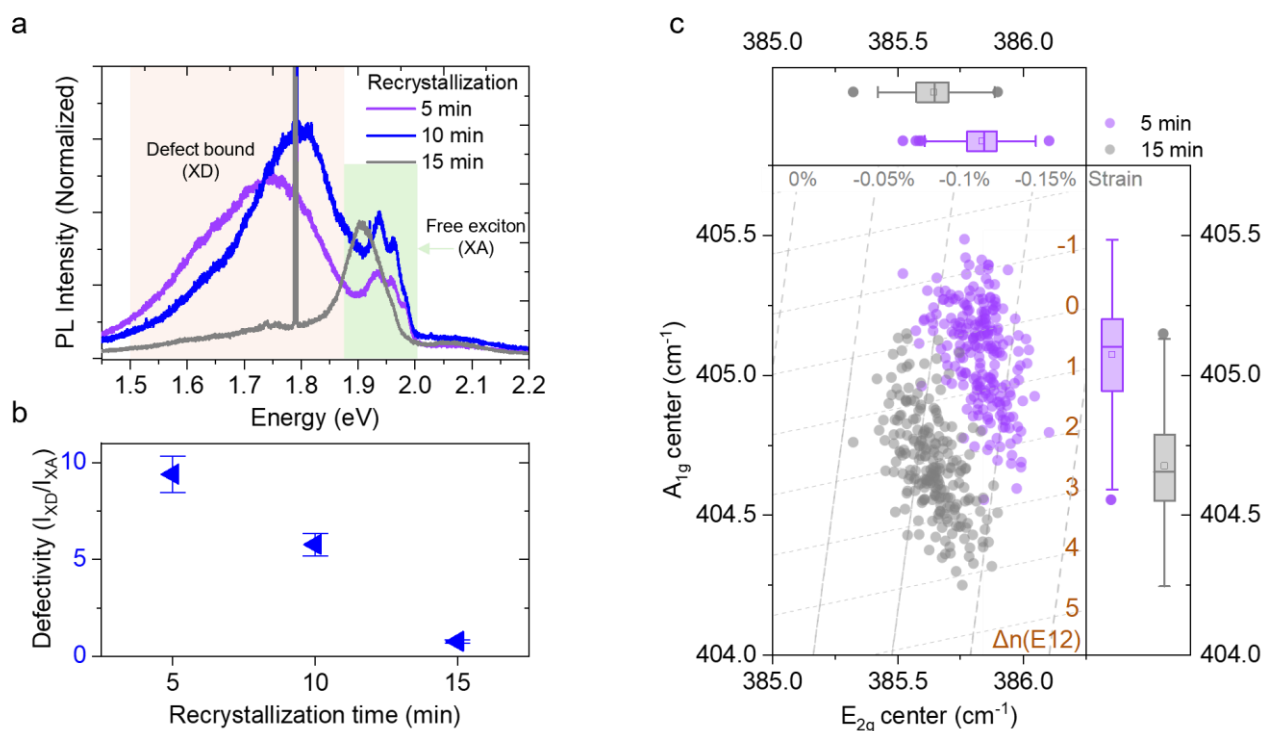

202

203 **Figure S10.** Improved crystallinity with recrystallization time influences the optical response of MoS<sub>2</sub> monolayers  
 204 growth in multidomain growth regime. **a**, Cryogenic PL at 78K demonstrate the notable spectra change for multi-  
 205 domain MoS<sub>2</sub> monolayers with the recrystallization time. The deconvoluted spectra are presented in Figure S18. **b**,  
 206 This is reflected in the extracted defectivity index ( $I_{XD}$  to  $I_{XA}$ ), as a ratio of integral intensity of defect-bound to free  
 207 excitons. **c**, Mapping  $A_{1g}$  and  $E_{2g}$  phonon peaks extracted from Raman spectra is used to assess strain and relative  
 208 change in doping of MoS<sub>2</sub> monolayer during recrystallization. MoS<sub>2</sub> monolayers are deposited using 1.0 ppm of  
 209 Mo(CO)<sub>6</sub>.



210

Supplementary figures

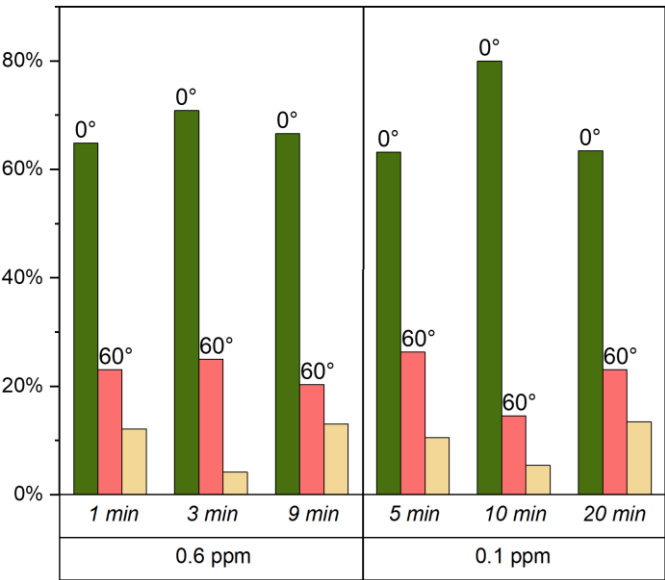

211

212

213

**Figure S11.** Percentage of 0° and 60° oriented crystals (green and red, respectively) during the different growth stages of MoS<sub>2</sub> crystals deposited with 0.6 and 0.1 ppm. The misoriented crystals are indicated in orange.

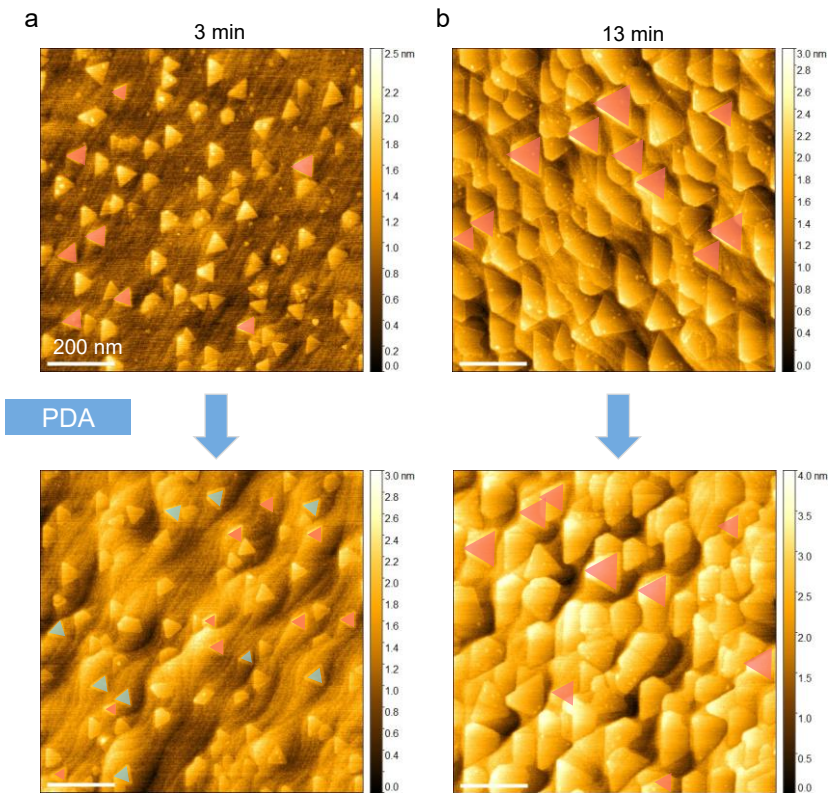

214

215

216

217

218

**Figure S12.** Effect of 10 min of post-deposition annealing (PDA) in H<sub>2</sub>S on the orientation of the isolated MoS<sub>2</sub> crystals deposited with 0.6 ppm of Mo(CO)<sub>6</sub>. Some 60° oriented crystals are highlighted in red. Transition 60° to 0° orientation is not observed. PDA causes more pronounced surface reconstruction and leads to an increase of the number of misoriented domains (in blue).

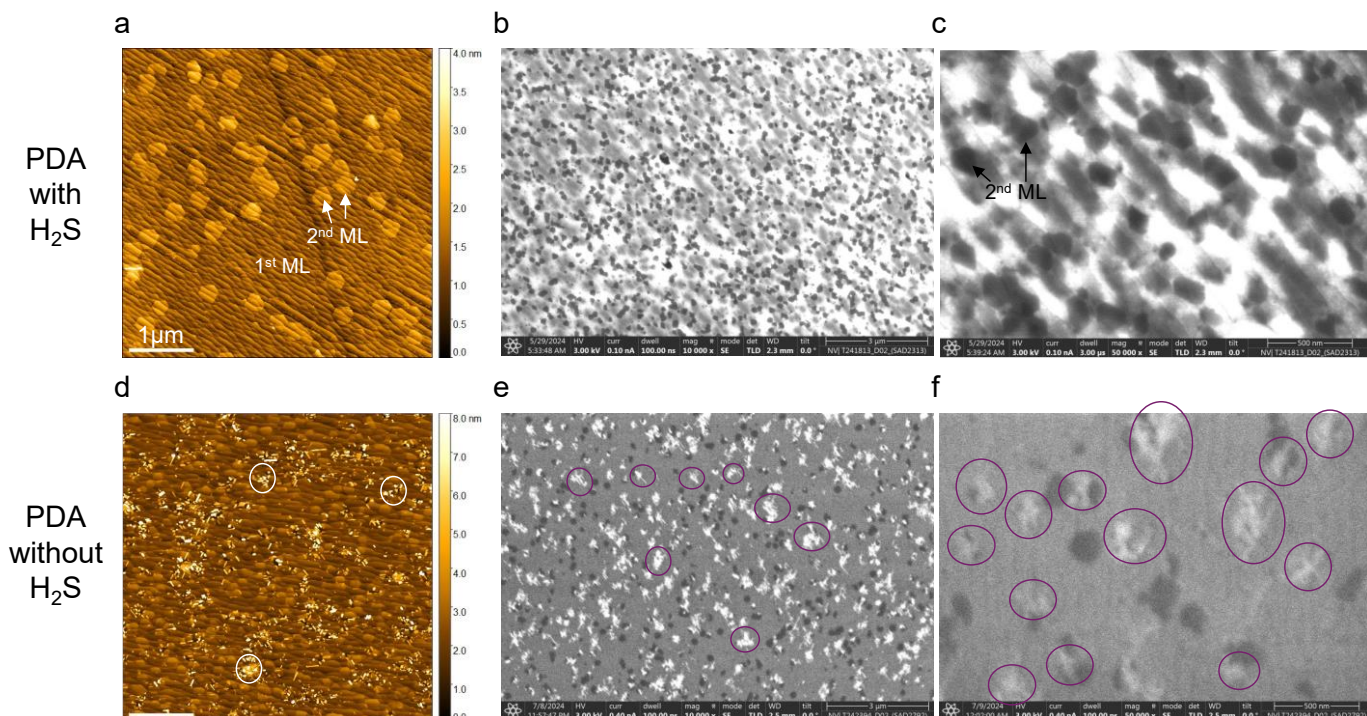

**Figure S13.** Effect of the atmosphere during 10 minutes of PDA at 1000 °C on the morphology of the closed MoS<sub>2</sub> monolayer deposited with 0.6 ppm of Mo(CO)<sub>6</sub>. PDA without H<sub>2</sub>S damages the first monolayer as well as the bilayer islands (indicated by the black arrows). The contrast in the SEM images of the closed MoS<sub>2</sub> monolayer is attributed to the water intercalation (b, c).

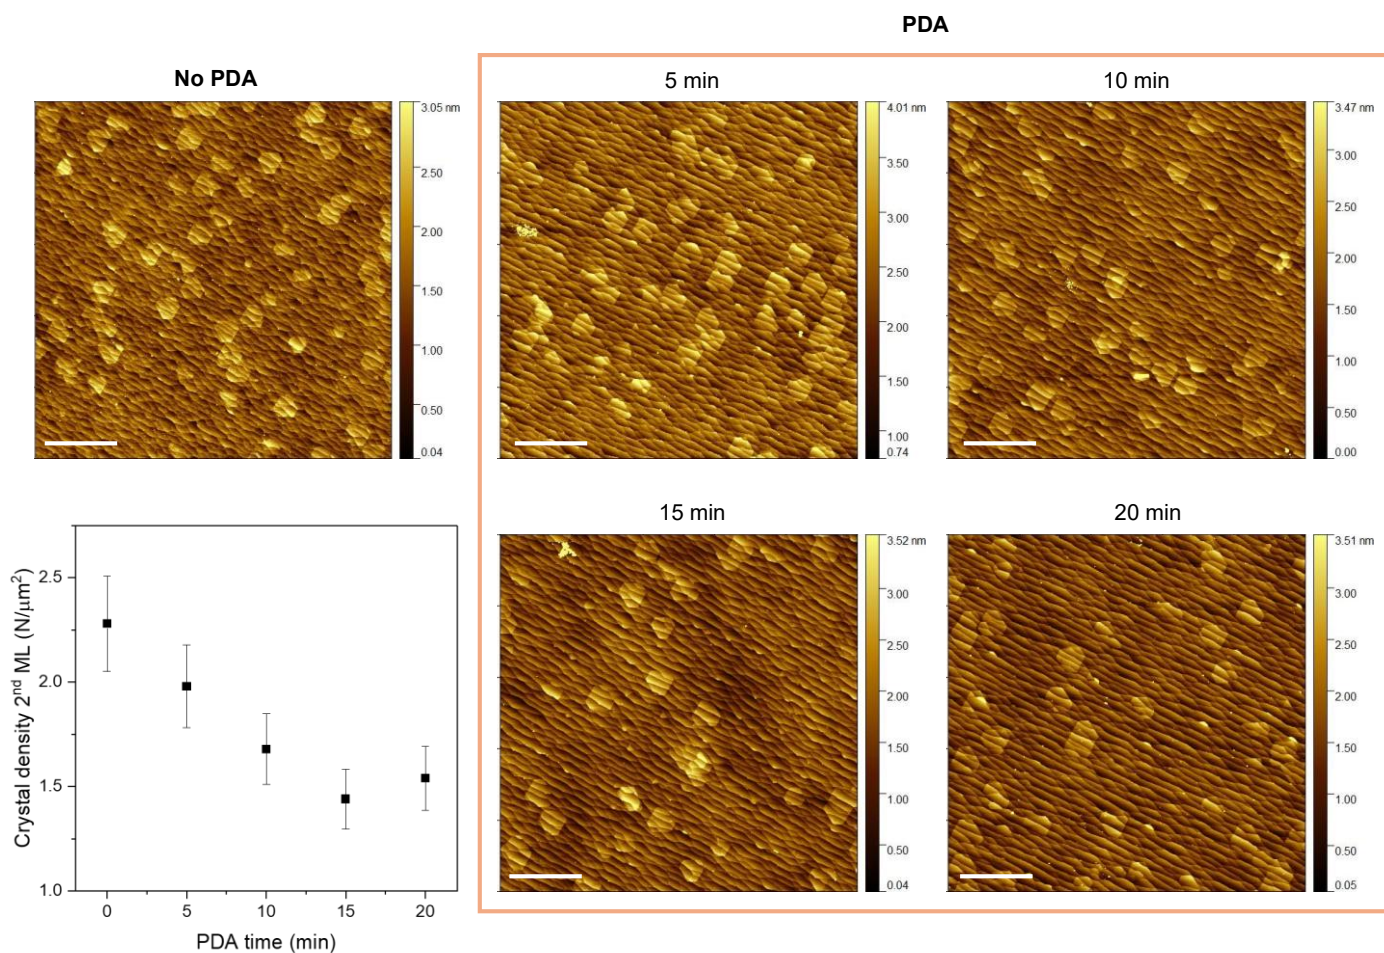

**Figure S14.** Decreasing 2<sup>nd</sup> MoS<sub>2</sub> monolayer crystal density with increasing PDA time. The MoS<sub>2</sub> monolayers are deposited with 0.6 ppm of Mo(CO)<sub>6</sub>, and PDA is performed in H<sub>2</sub>S at 1000 °C.



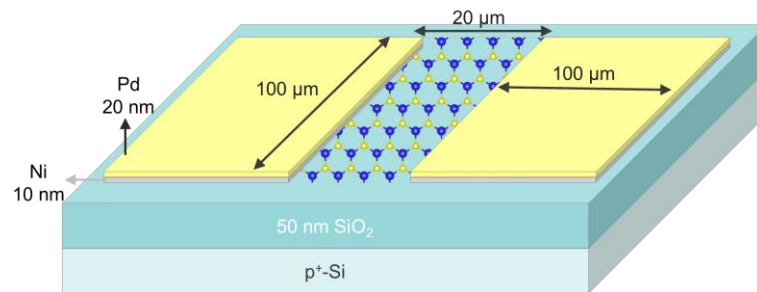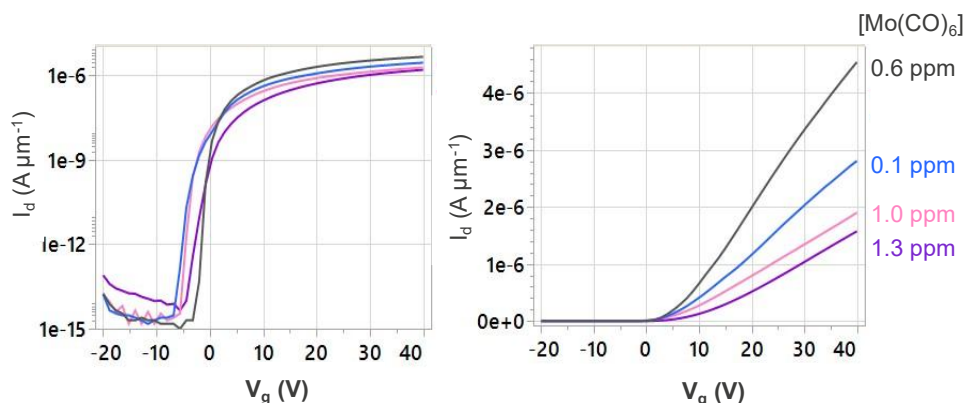

**Figure S15.** A schematic of the back-gated FET and drain current for MoS<sub>2</sub> monolayers presented in Figure 4c (top). The recrystallization time of 10 min is applied to all MoS<sub>2</sub> monolayers after a layer closure. A higher drain current ( $I_d$ ) is observed for the lower metal precursor concentrations of 0.6 ppm and 0.1 ppm. A linear (right) and a logarithmic (left) scale are depicted as a function of gate voltage ( $V_g$ ) for 1V drain voltage.

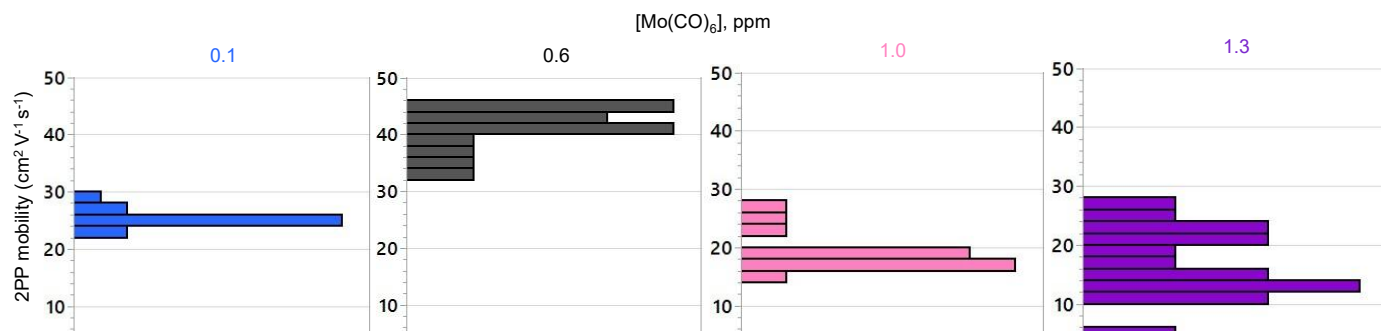

**Figure S16.** Statistical distribution of the 2pp mobility measured in the lab-fabricated back-gated FET with MoS<sub>2</sub> active layer.

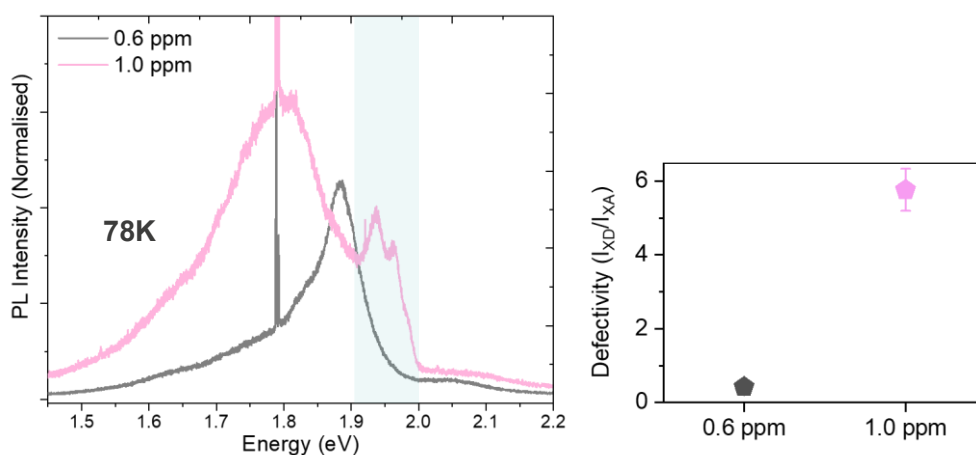

**Figure S17.** Cryogenic photoluminescence (PL) at 78K reveals a 98 meV shift (blue line) between singlecrystalline (0.6 ppm) MoS<sub>2</sub> monolayer and MoS<sub>2</sub> monolayer with misoriented domains (1.0 ppm) due to an impact of interface

charges. The defectivity index is extracted from cryogenic PL and is higher for the monolayers containing misoriented domains compared to single-crystalline MoS<sub>2</sub> monolayer.

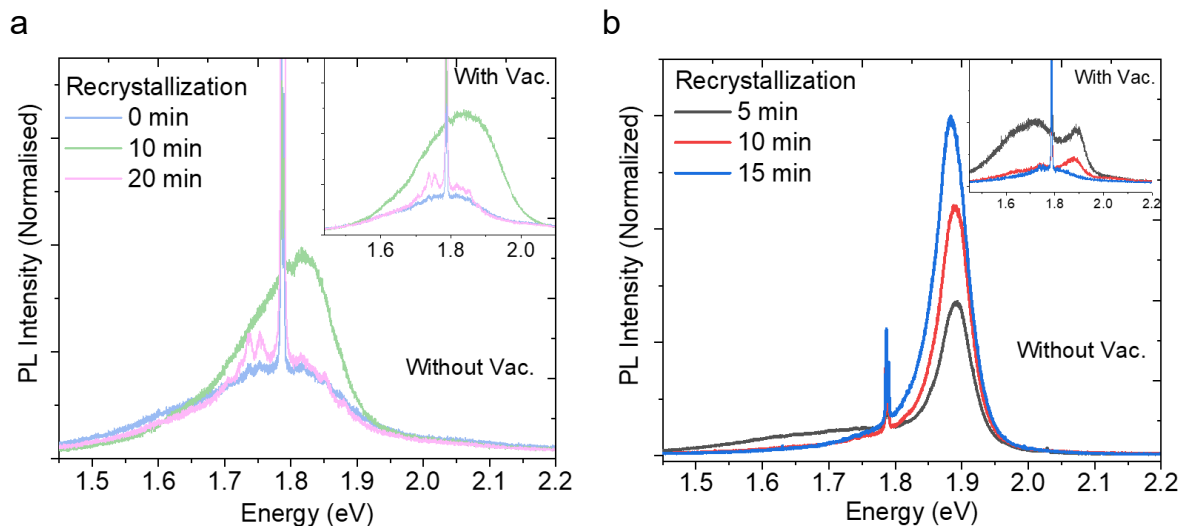

**Figure S18.** Room temperature photoluminescence (RT-PL) with and without vacuum for MoS<sub>2</sub> monolayers deposited with 0.6 (a) and 1.0 ppm (b) of Mo(CO)<sub>6</sub> after different recrystallization times. The room temperature responses tend to change significantly when transitioning from a non-vacuum to a vacuum environment. This is due to various atmospheric species, such as O<sub>2</sub>, H<sub>2</sub>O, and organic molecules, which can physisorb onto the defective surfaces (including grain boundaries) of monolayer MoS<sub>2</sub>. **a**, Here, the negligible differences in RT-PL responses between the vacuum and non-vacuum conditions confirm the high quality and lower presence of defect centers in the single-crystalline MoS<sub>2</sub> monolayer grown in self-oriented growth regime. **b**, This is in contrast with MoS<sub>2</sub> monolayers grown in multi-domain regime, where a pronounce difference in RT-PL is observed between vacuum and non-vacuum conditions.

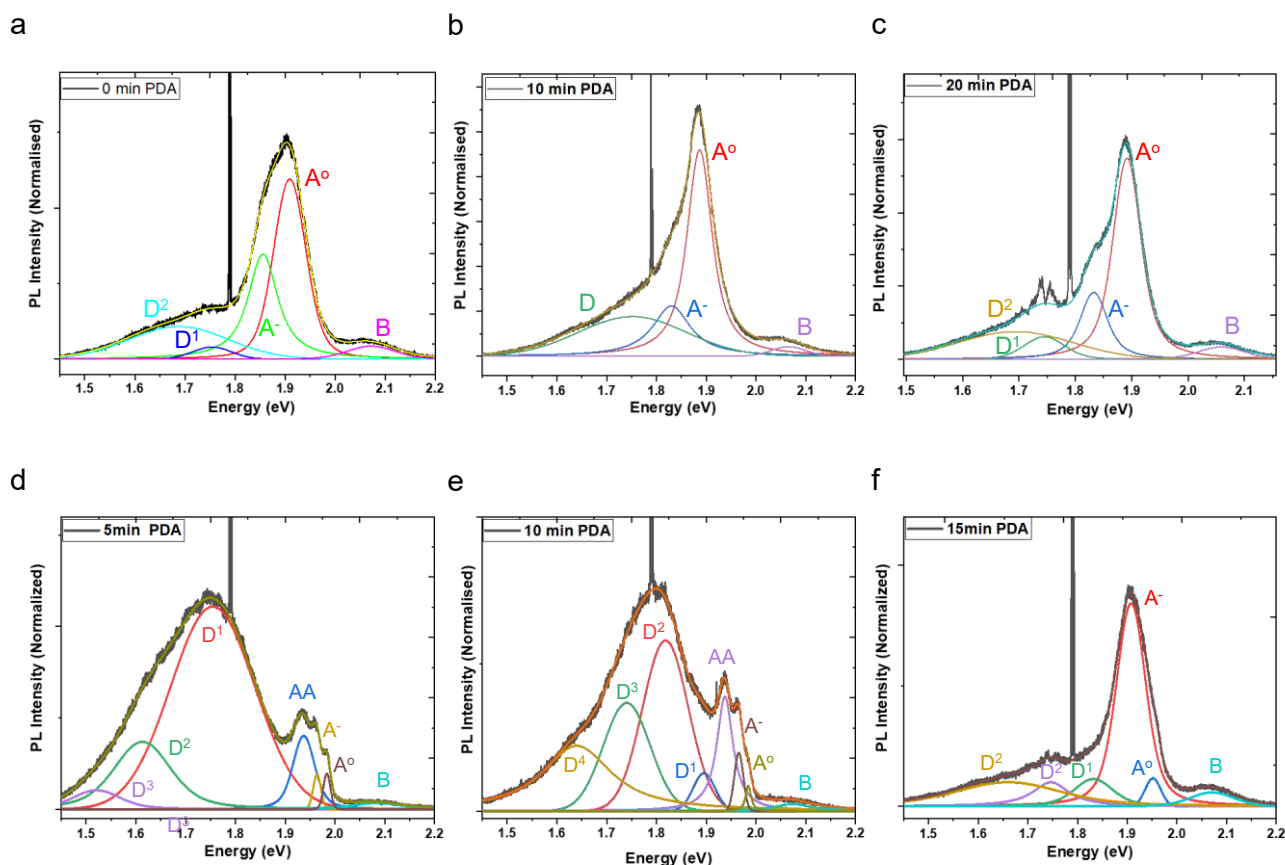

252 **Figure S19.** Deconvolution of the cryogenic PL at 78K from Figure 5a and -d after different recrystallization times  
 253 using the Lorentzian function. MoS<sub>2</sub> monolayers were deposited with 0.6 (a, b, c) and 1.0 ppm (d, e, f) of Mo(CO)<sub>6</sub>.  
 254 The spectra in (a, b, c) and (d, e, f) correspond to Figure 5a and -d, respectively. A<sup>0</sup>, A<sup>-</sup>, AA, B, and D correspond to  
 255 neutral exciton, charged exciton (trion), biexciton, B exciton, and low temperature defect bands, respectively. If the  
 256 fitting results in the few defect bands, they are numbered D<sup>1</sup>, D<sup>2</sup>, etc.

257

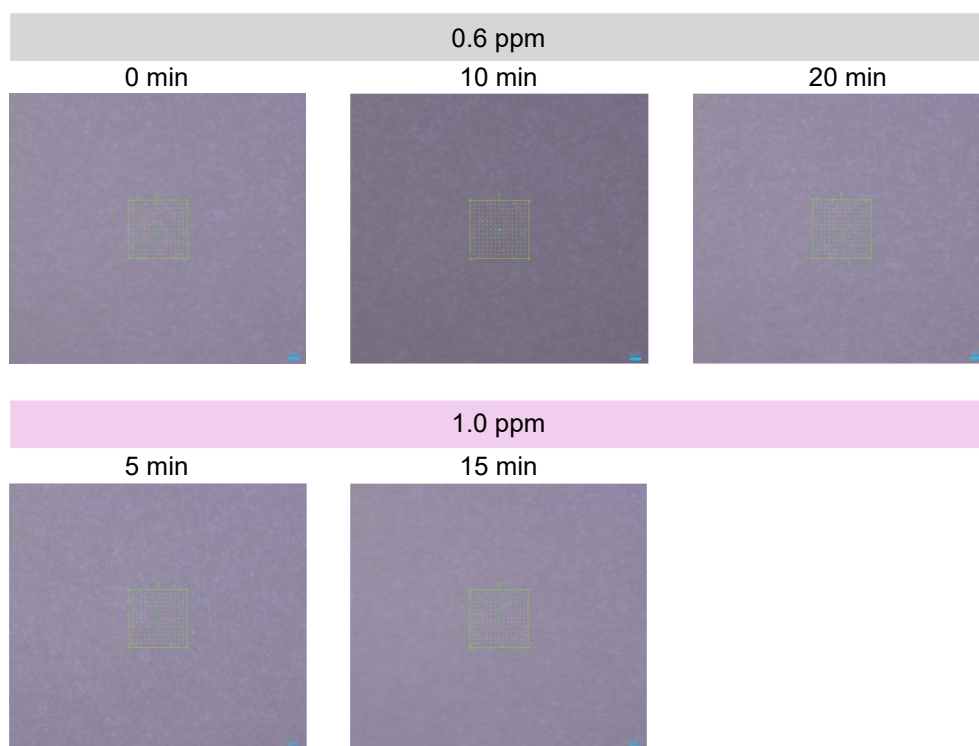

258

259 **Figure S20.** Optical images of the areas where 225 Raman spectra were acquired of MoS<sub>2</sub> monolayers on sapphire  
 260 deposited with 0.6 and 1.0 ppm of Mo(CO)<sub>6</sub>.

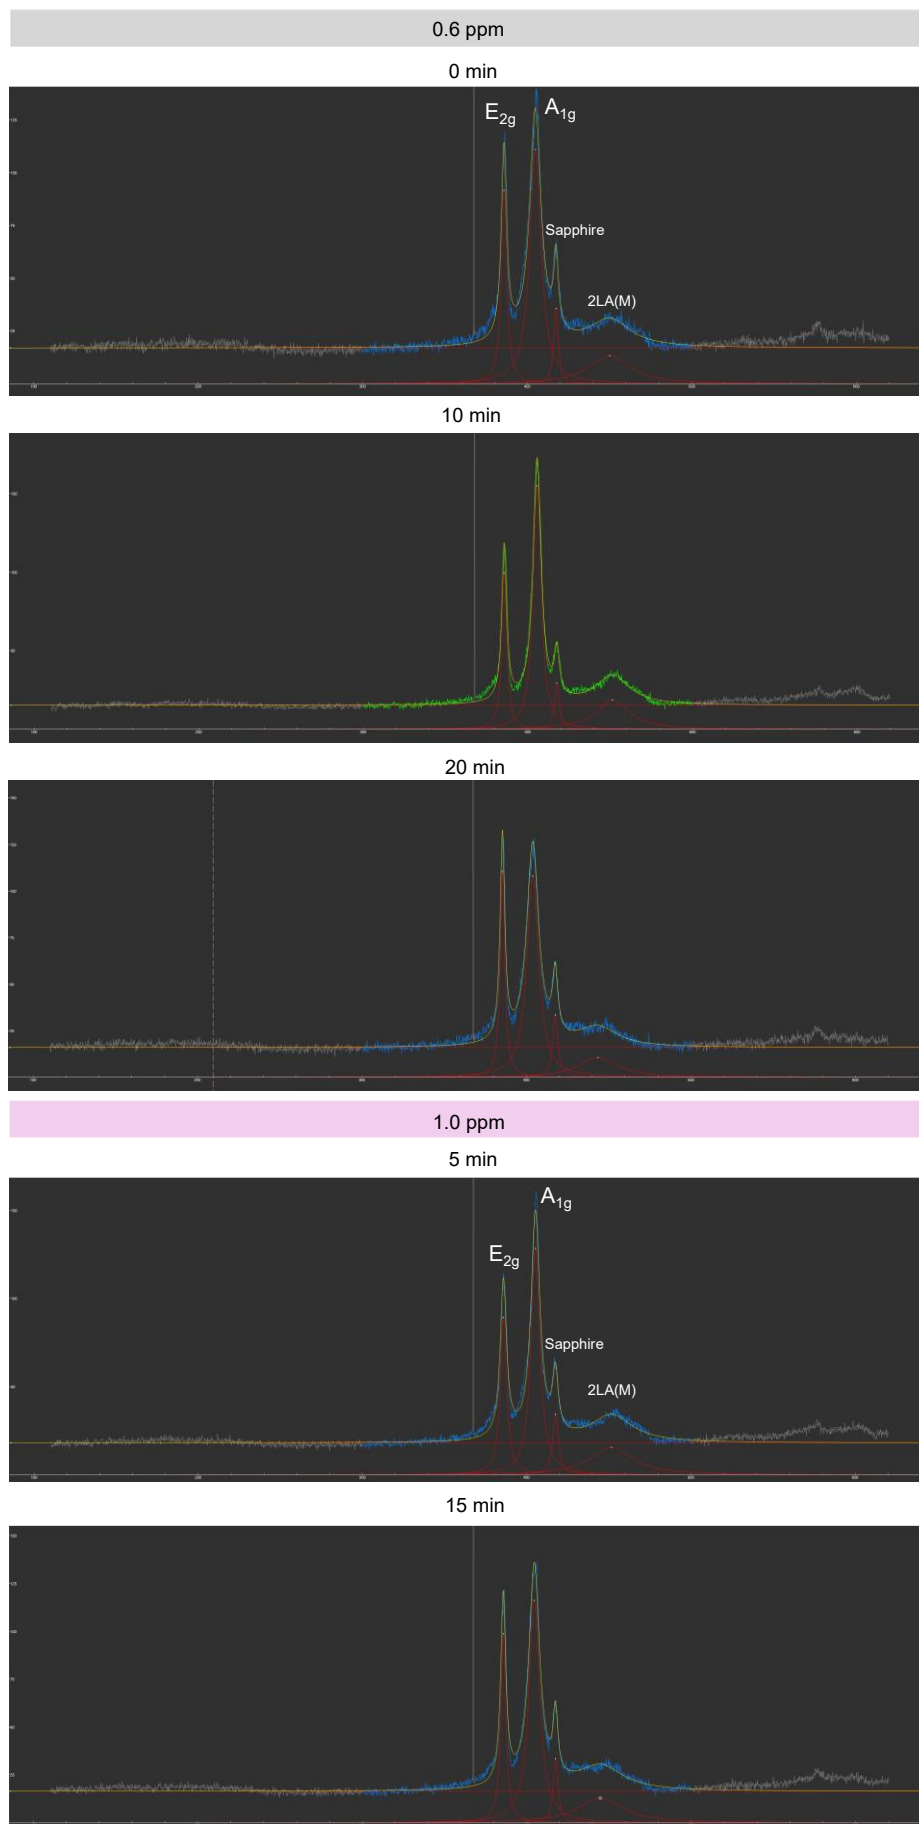

**Figure S21.** Typical Raman spectral response, obtained from MoS<sub>2</sub> monolayer deposited with 0.6 and 1.0 ppm of Mo(CO)<sub>6</sub> after different recrystallization times.

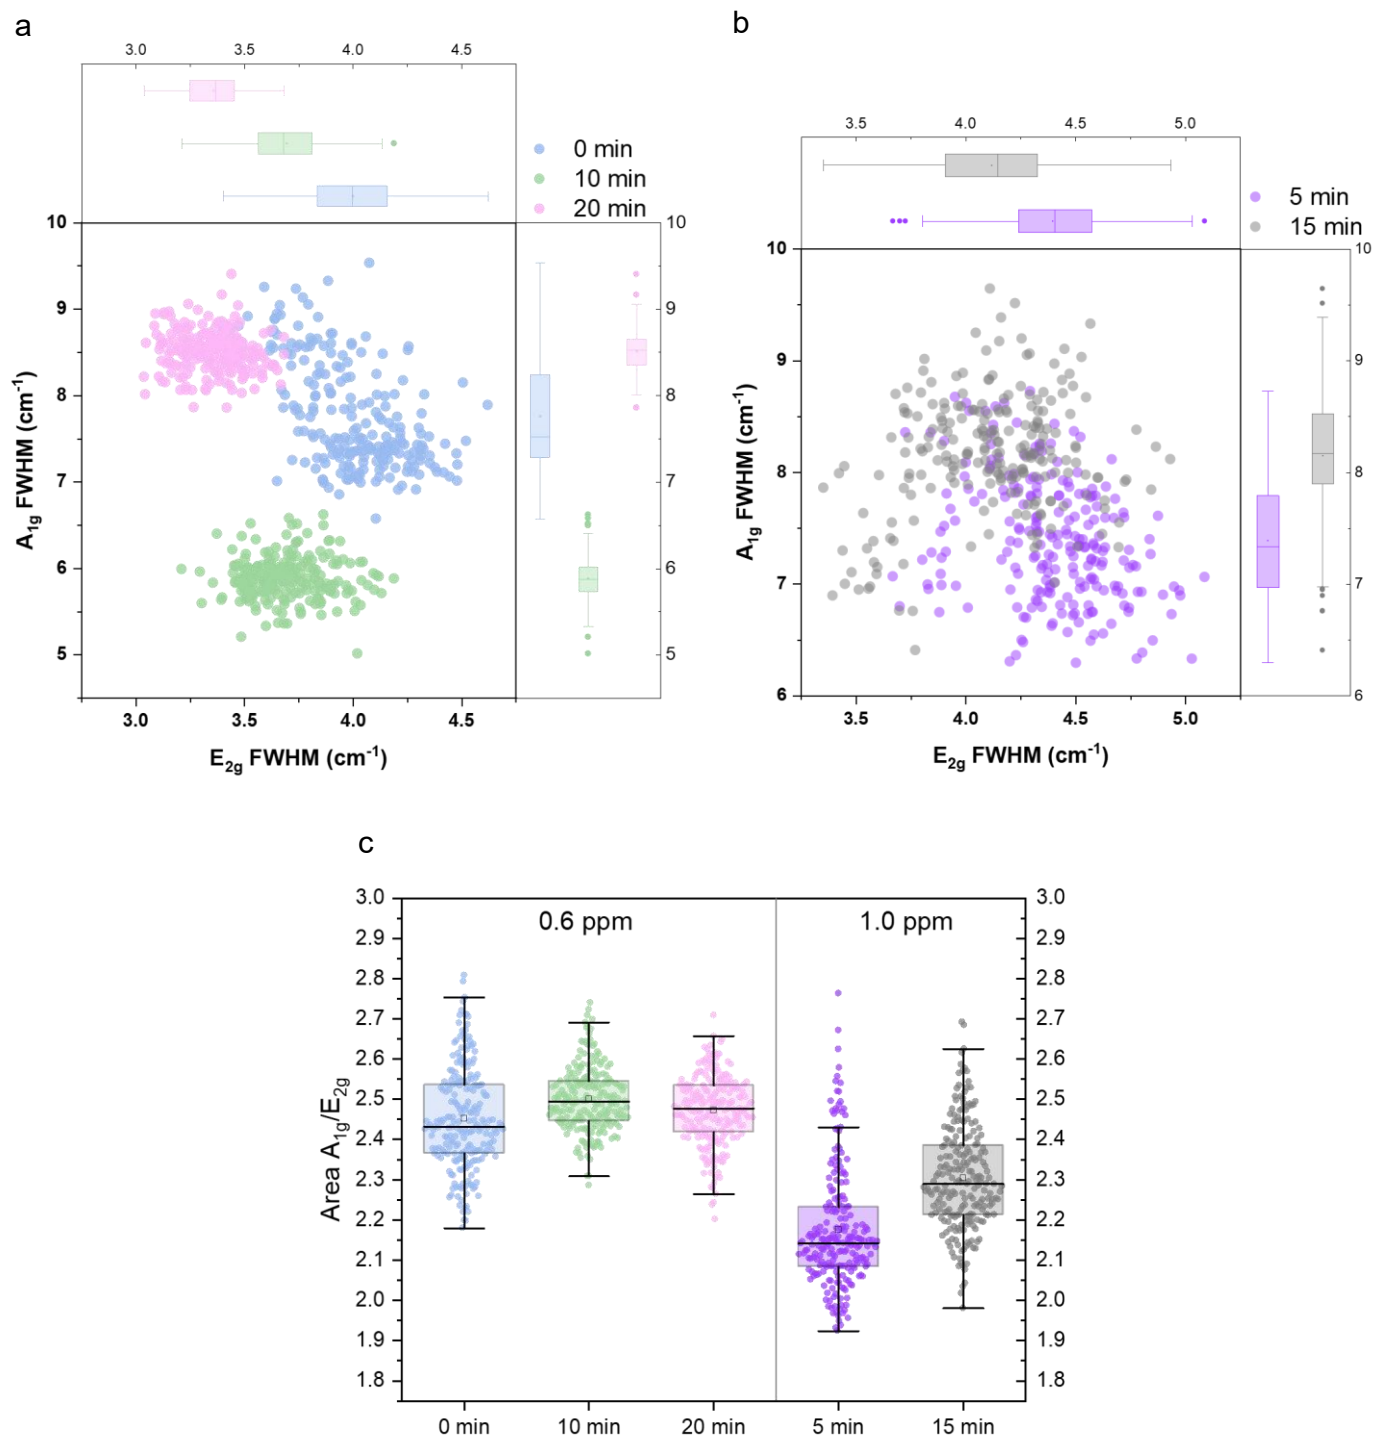

**Figure S22.** Statistical interpretation of the extracted  $A_{1g}$  and  $E_{2g}$  peaks from Raman spectral response, obtained from MoS<sub>2</sub> monolayer deposited with 0.6 (a) and 1.0 ppm (b) of Mo(CO)<sub>6</sub> after different recrystallization times.



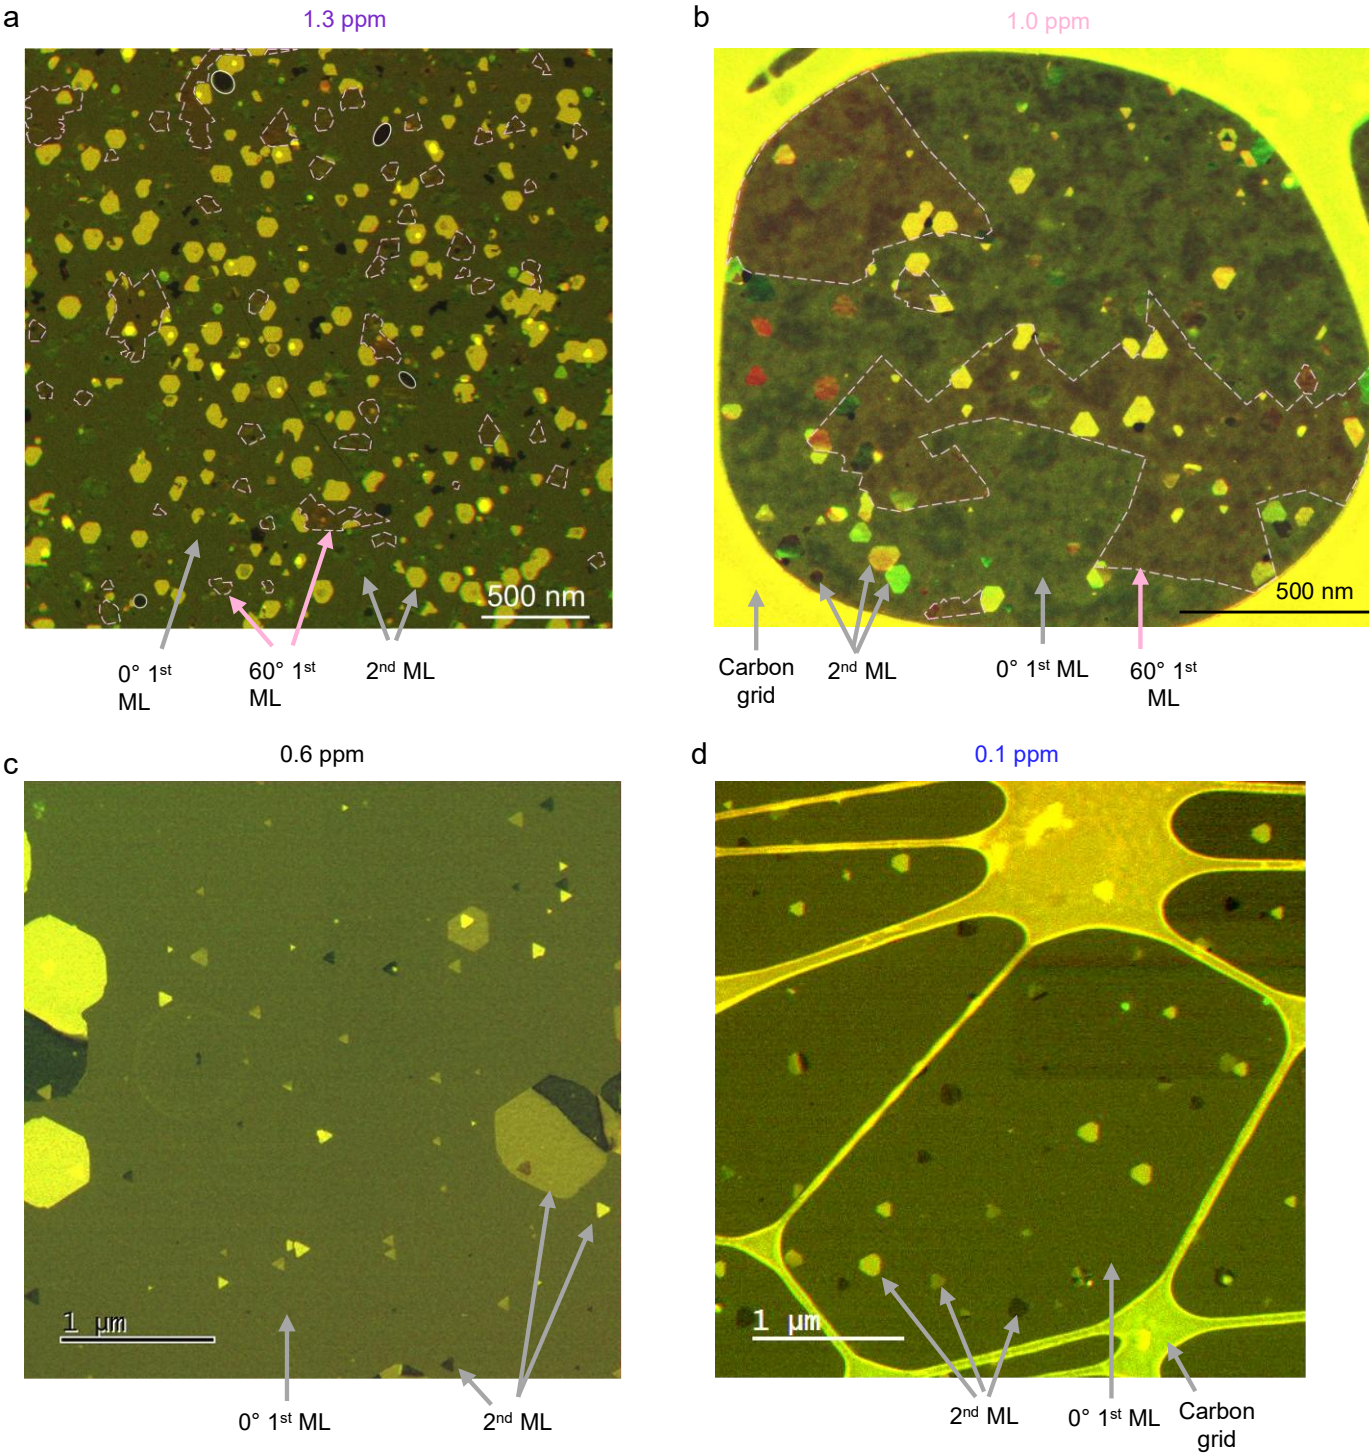

269

270

**Figure 23.** Large field of view composite TEM images of MoS<sub>2</sub> monolayers presented in Figure 4a.

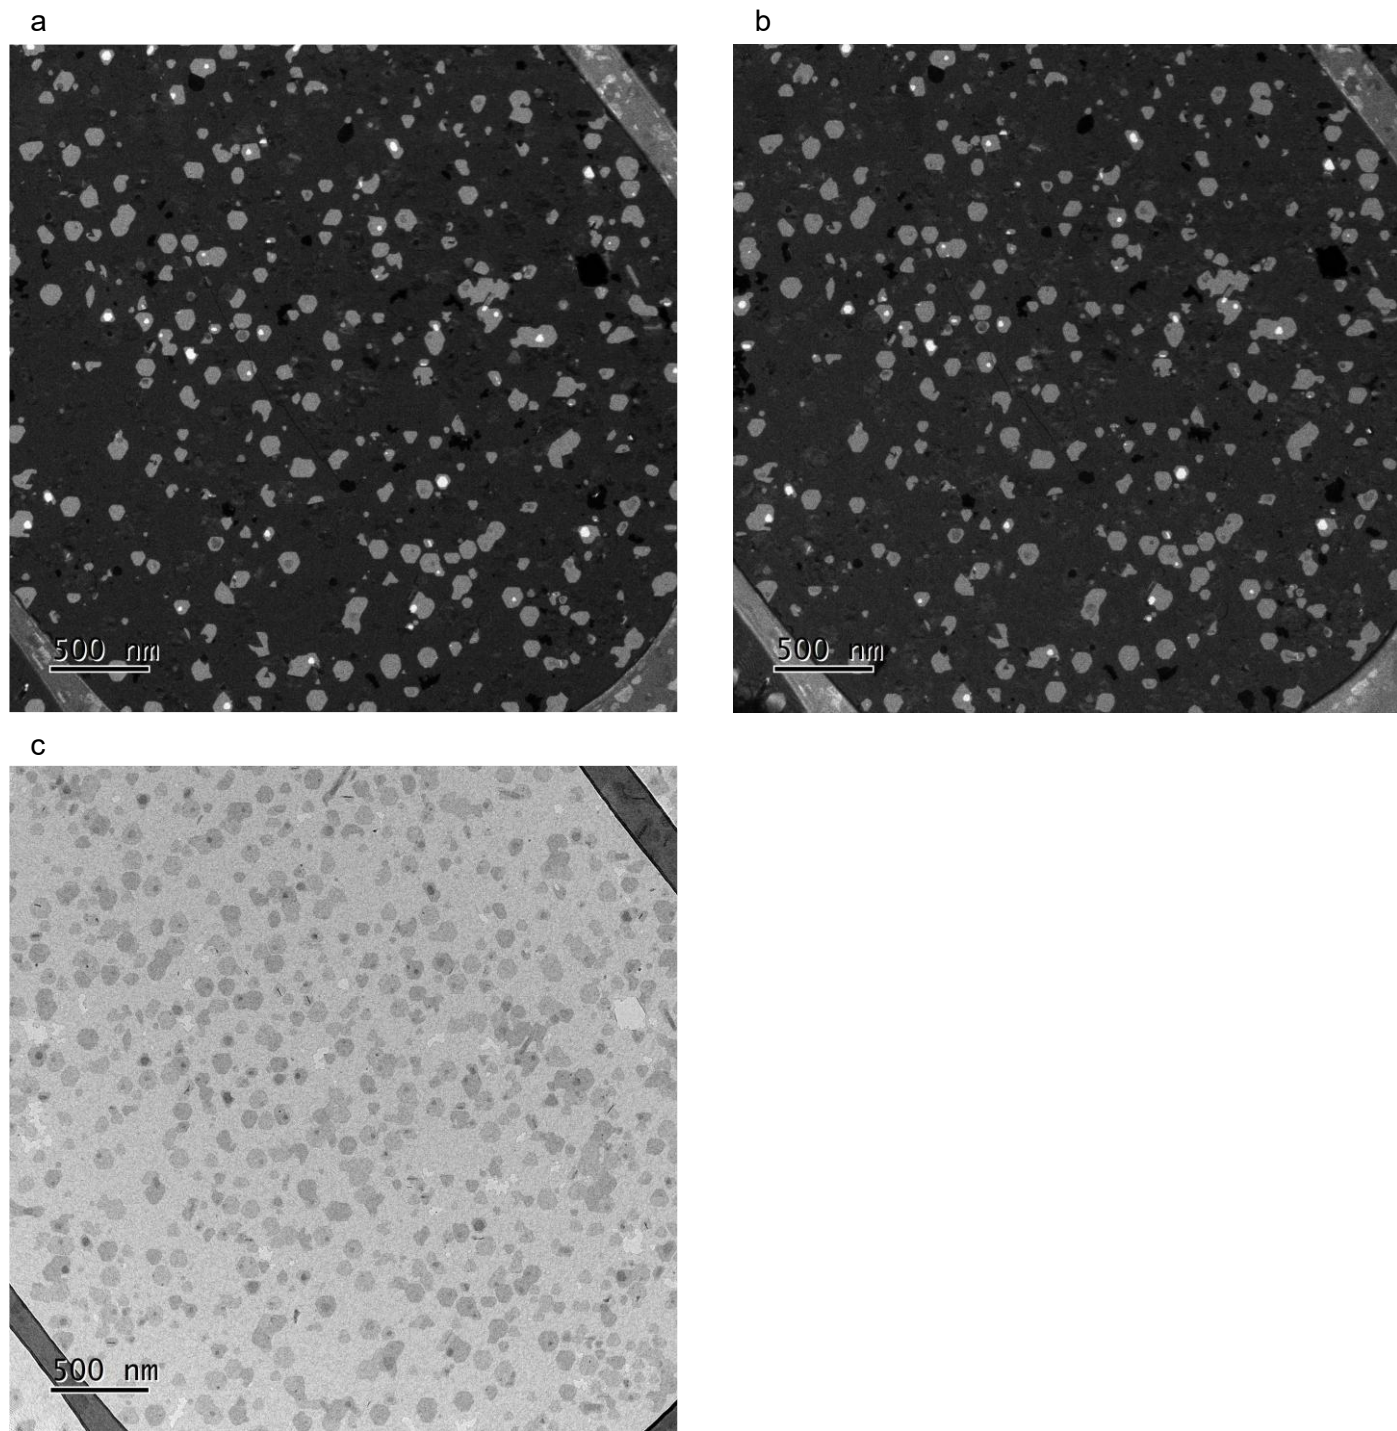

**Figure S24.** The dark-field TEM images (a, b) of the  $\text{MoS}_2$  monolayer used for the composite image with false colors in Figure S23a. A bright-field TEM image of the same area is presented in (c).



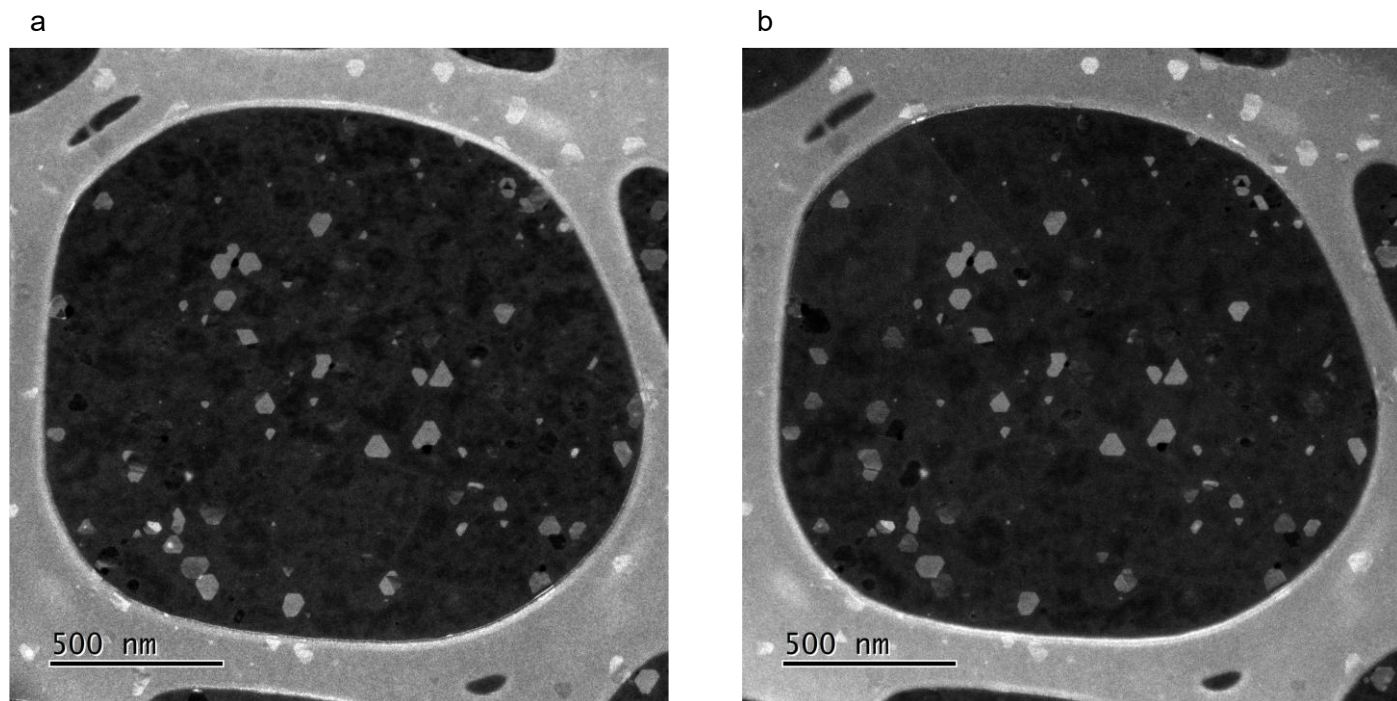

**Figure S25.** The dark-field TEM images (a, b) of the MoS<sub>2</sub> monolayer used for the composite image with false colors in Figure S23b.

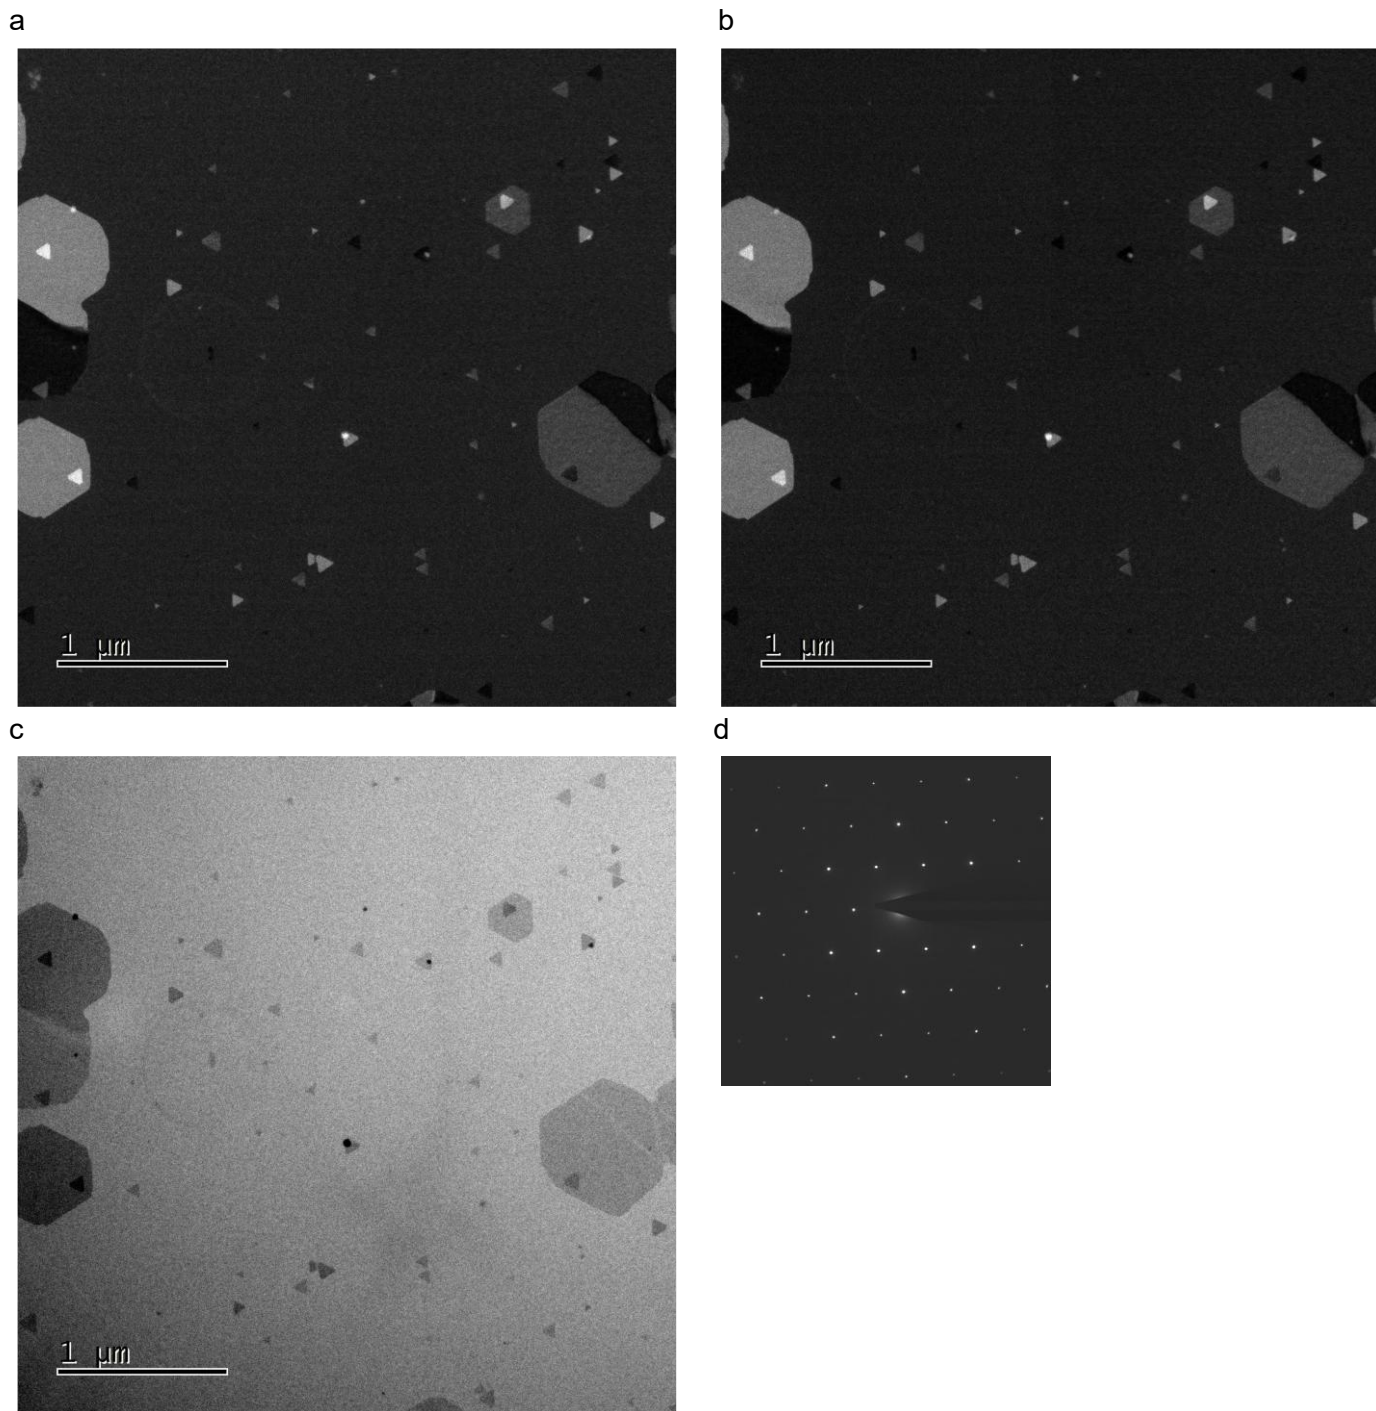

**Figure S26.** The dark-field TEM images (a, b) of the MoS<sub>2</sub> monolayer used for the composite image with false colors in Figure S23c. A bright-field TEM image and a diffraction pattern of the same area is presented in (c) and (d), respectively.

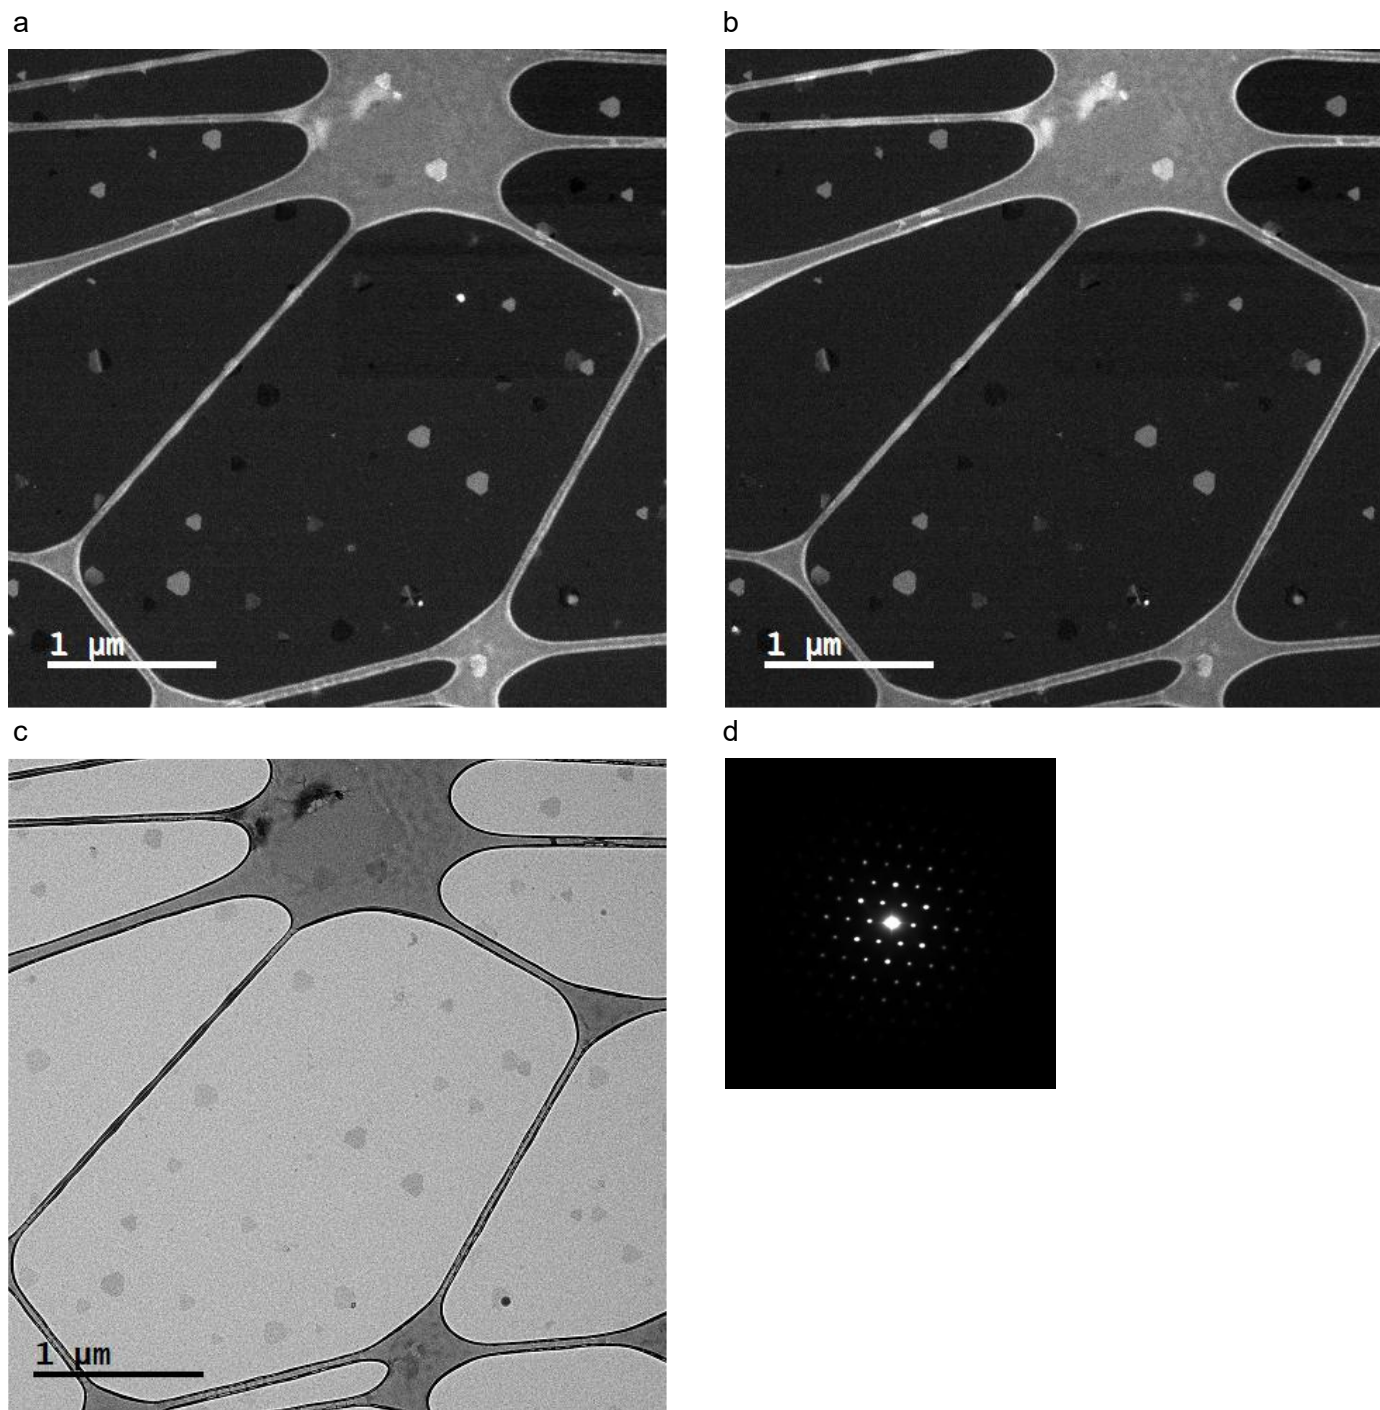

**Figure S27.** The dark-field TEM images (a, b) of the MoS<sub>2</sub> monolayer used for the composite image with false colors in Figure S23d. A bright-field TEM image and a diffraction pattern of the same area is presented in (c) and (d), respectively.



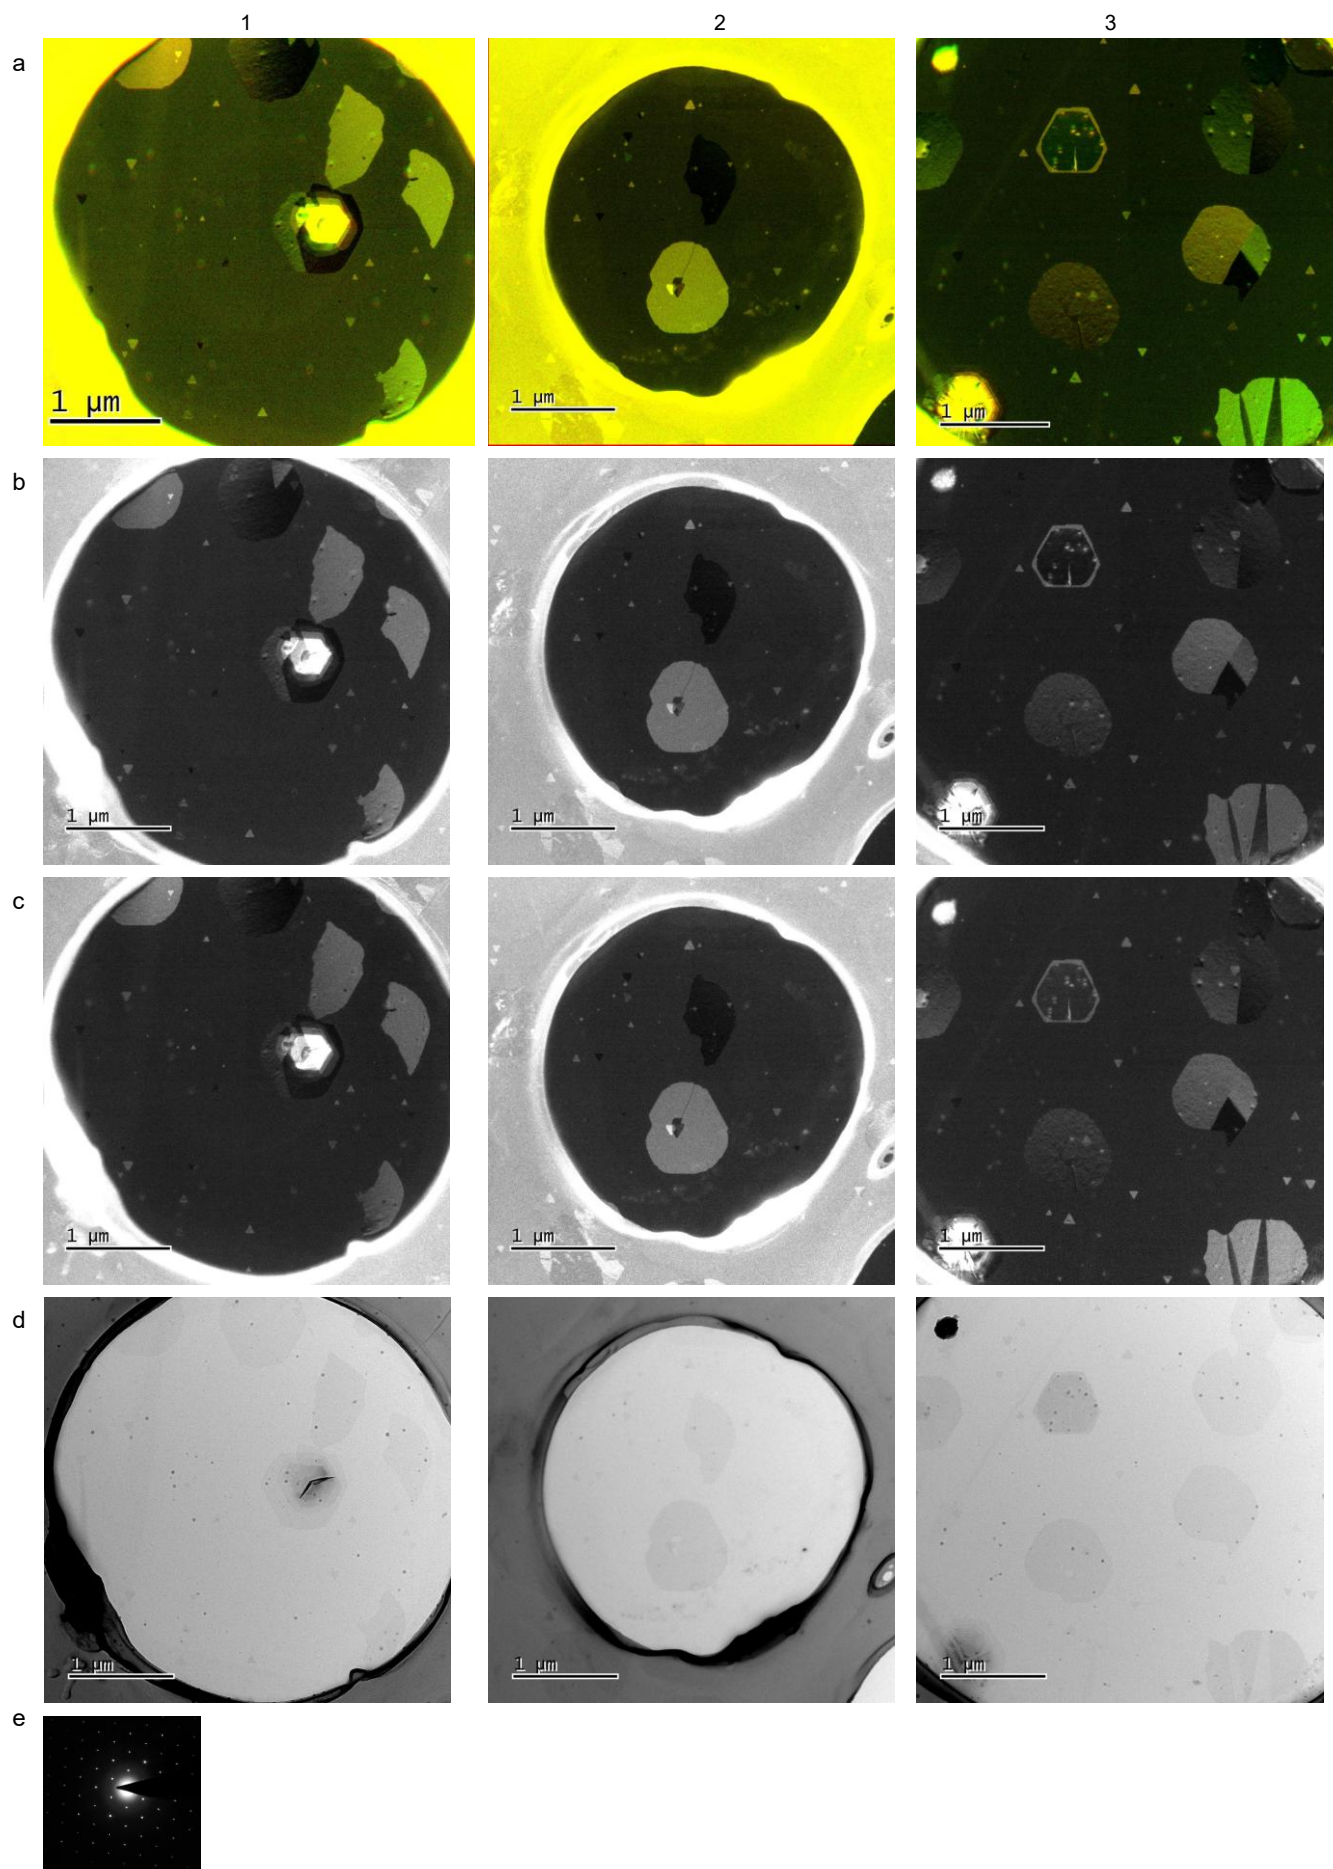

**Figure S28.** The additional TEM images from 3 regions for the MoS<sub>2</sub> monolayers deposited with 0.6 ppm of Mo(CO)<sub>6</sub>, demonstrating the single-crystalline nature of the film. The composite images with false colors (a) are composed

290 using the dark-field TEM images (b, c). The bright-field TEM images and a diffraction pattern of the same area are  
291 presented in (d) and (e), respectively.



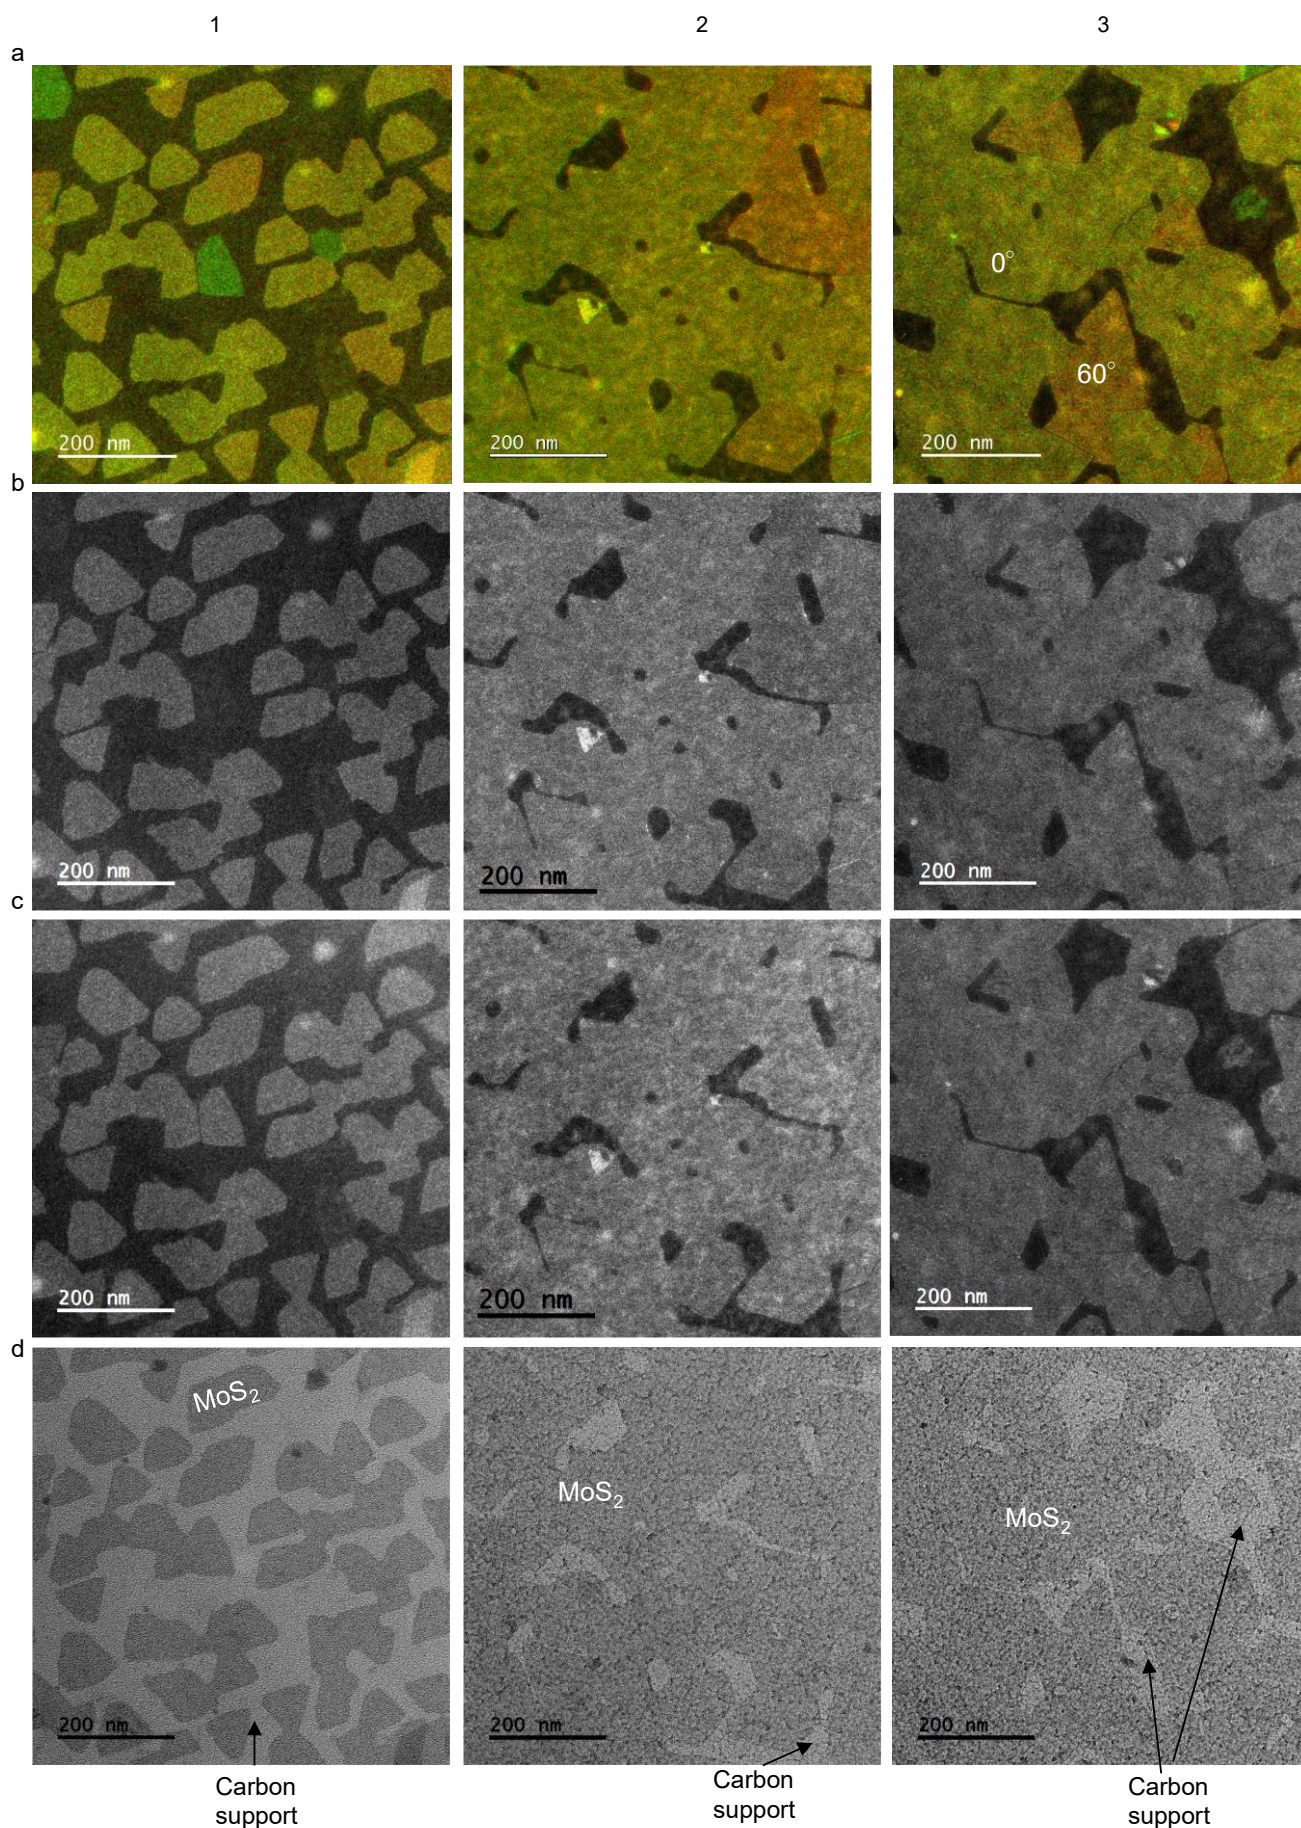

**Figure S29.** The TEM images from 3 of the MoS<sub>2</sub> crystals deposited with 0.6 ppm of Mo(CO)<sub>6</sub> for 13 min (1) and 19 min (2 and 3). The composite images with false colors (a) are composed using the dark-field TEM images (b, c). The bright-field TEM images are presented in (d). The composite images from regions 1 and 2 were used in Figure 2b.



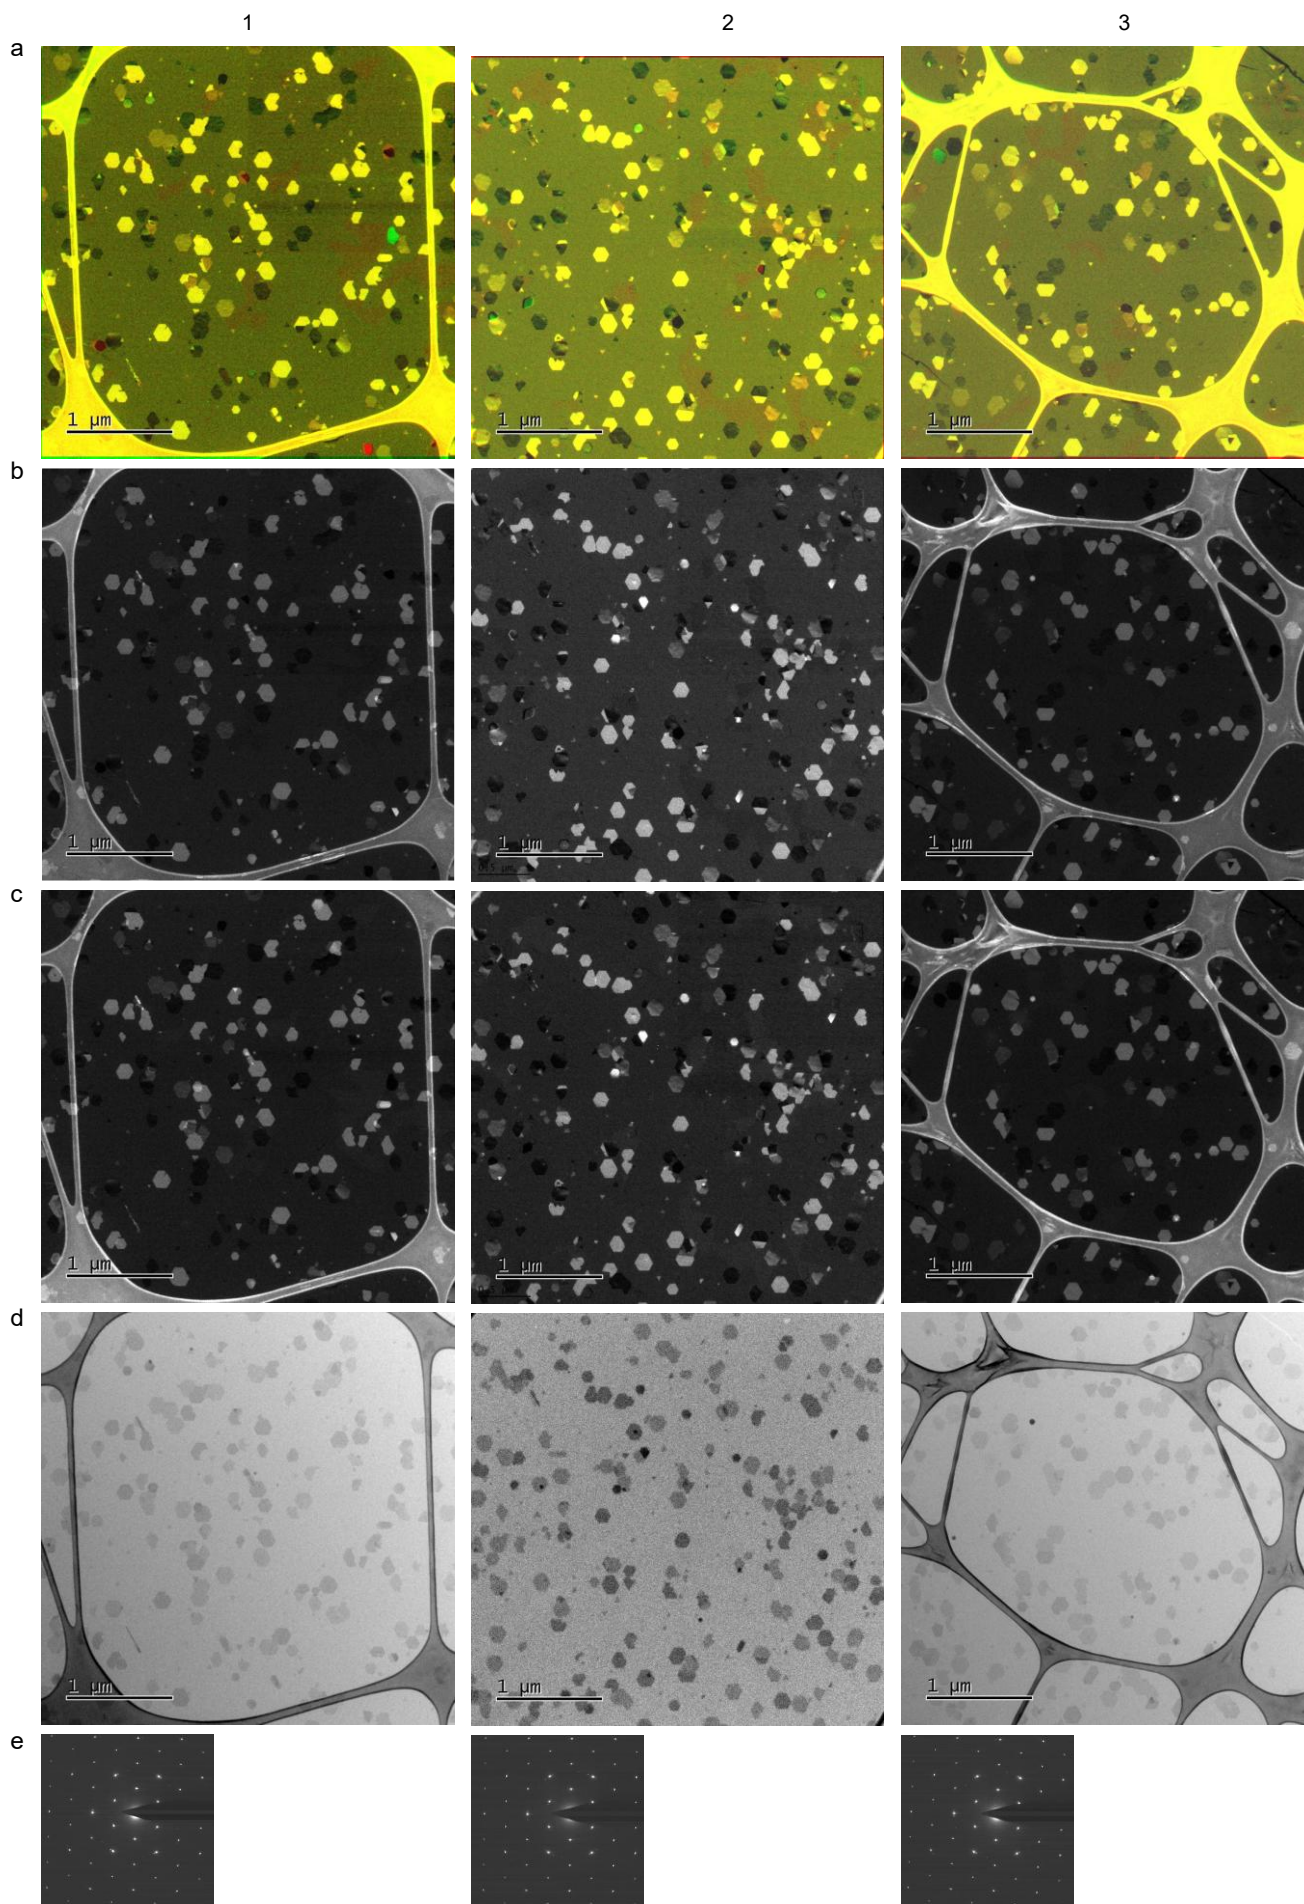

**Figure S30.** The TEM images from 3 regions for the MoS<sub>2</sub> monolayer deposited with 0.6 ppm of Mo(CO)<sub>6</sub> for 22 min (Sample 1). The composite images with false colors (a) are composed using the dark-field TEM images (b, c). The red



299 areas on the composite images correspond to twin domains. The bright-field TEM images and the diffraction patterns  
300 are presented in (d) and (e), respectively. The composite image from region 2 was used in Figure 2b.

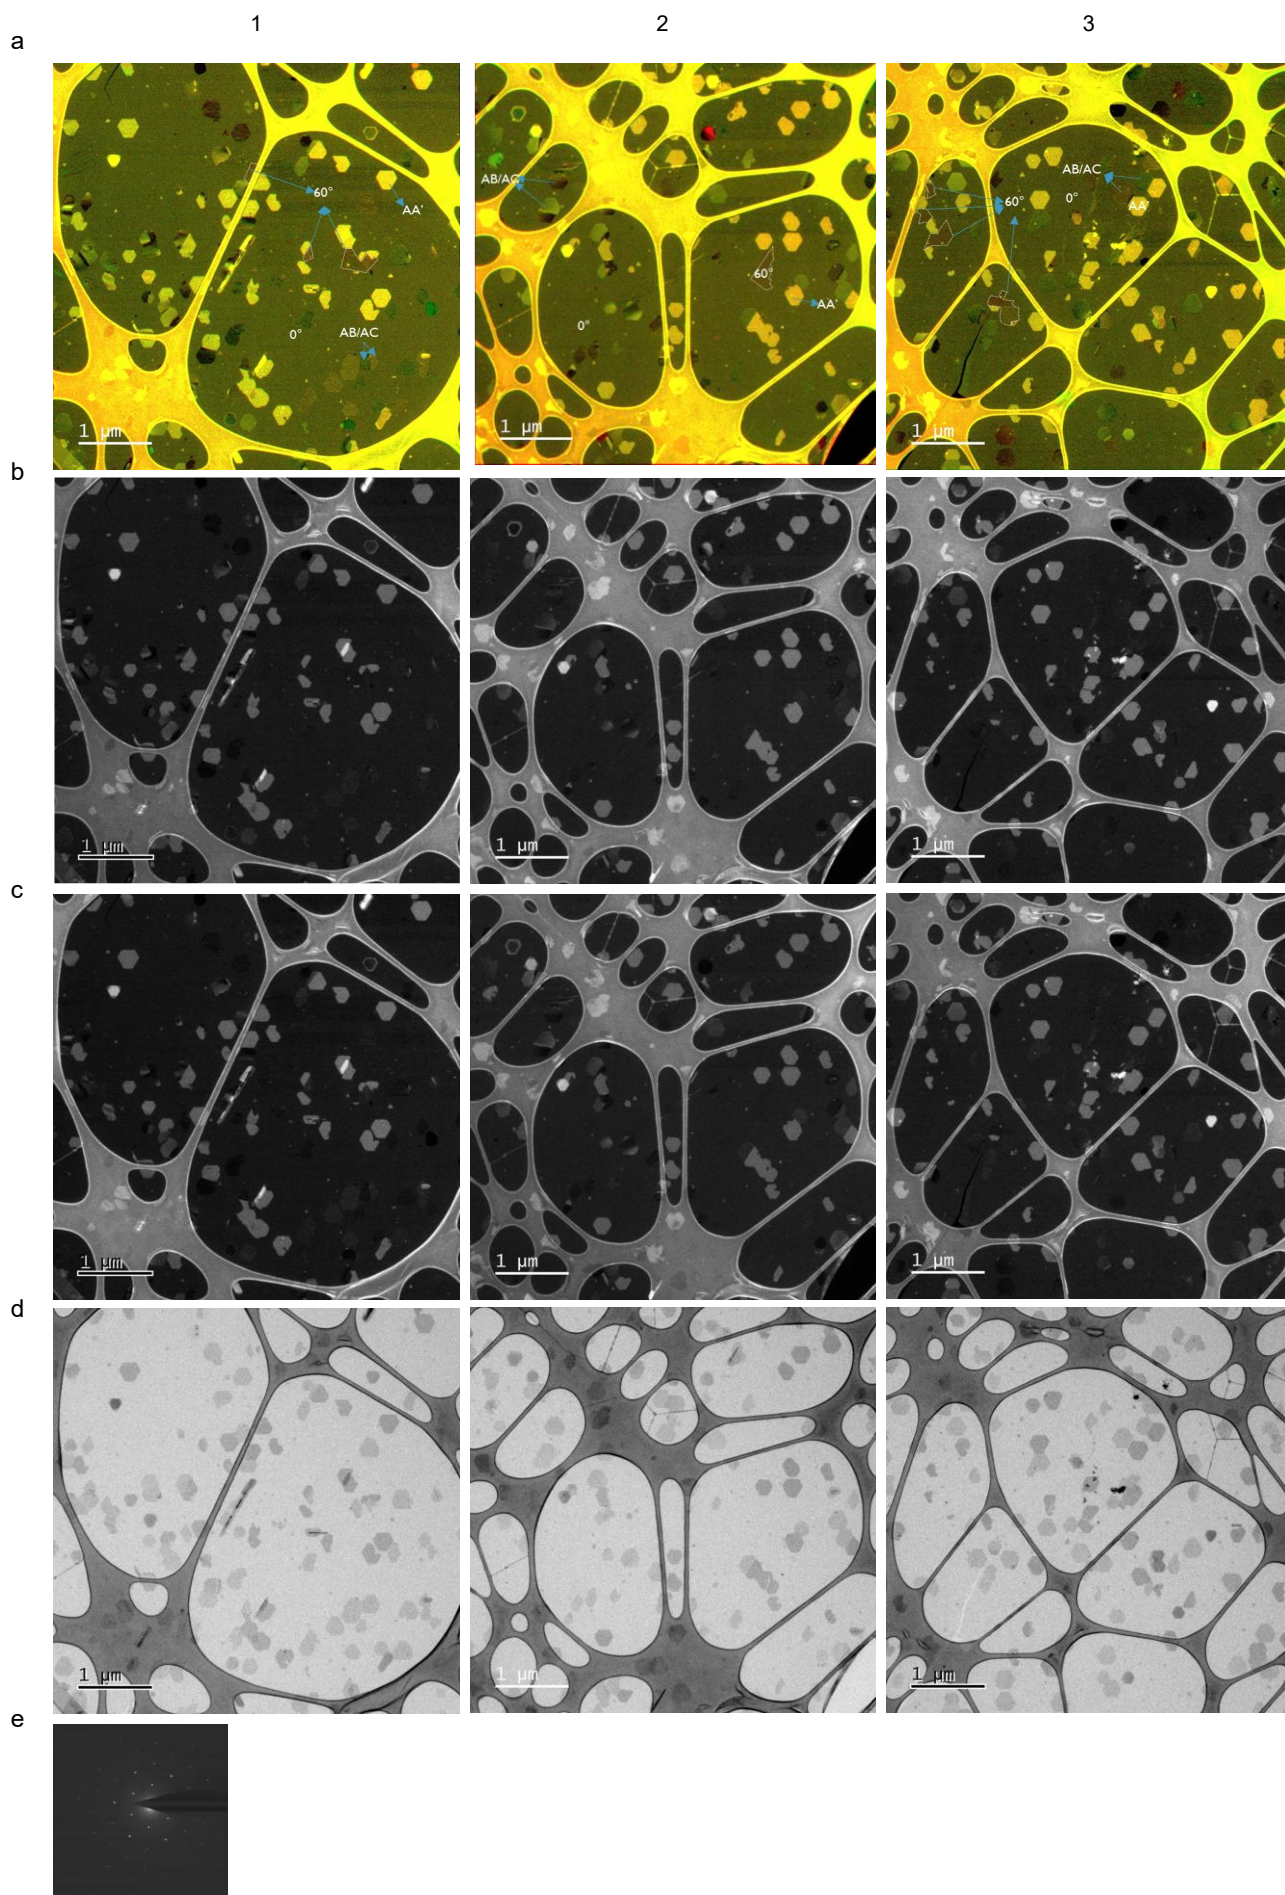

**Figure S31.** The TEM images from 3 regions for the MoS<sub>2</sub> monolayer deposited with 0.6 ppm of Mo(CO)<sub>6</sub> for 22 min (Sample 2). The composite images with false colors (a) are composed using the dark-field TEM images (b, c). The red

304 areas on the composite images correspond to twin domains, as highlighted on the images. The stacking of the second  
305 layer islands is also highlighted. The bright-field TEM images and a diffraction pattern are presented in (d) and (e),  
306 respectively.



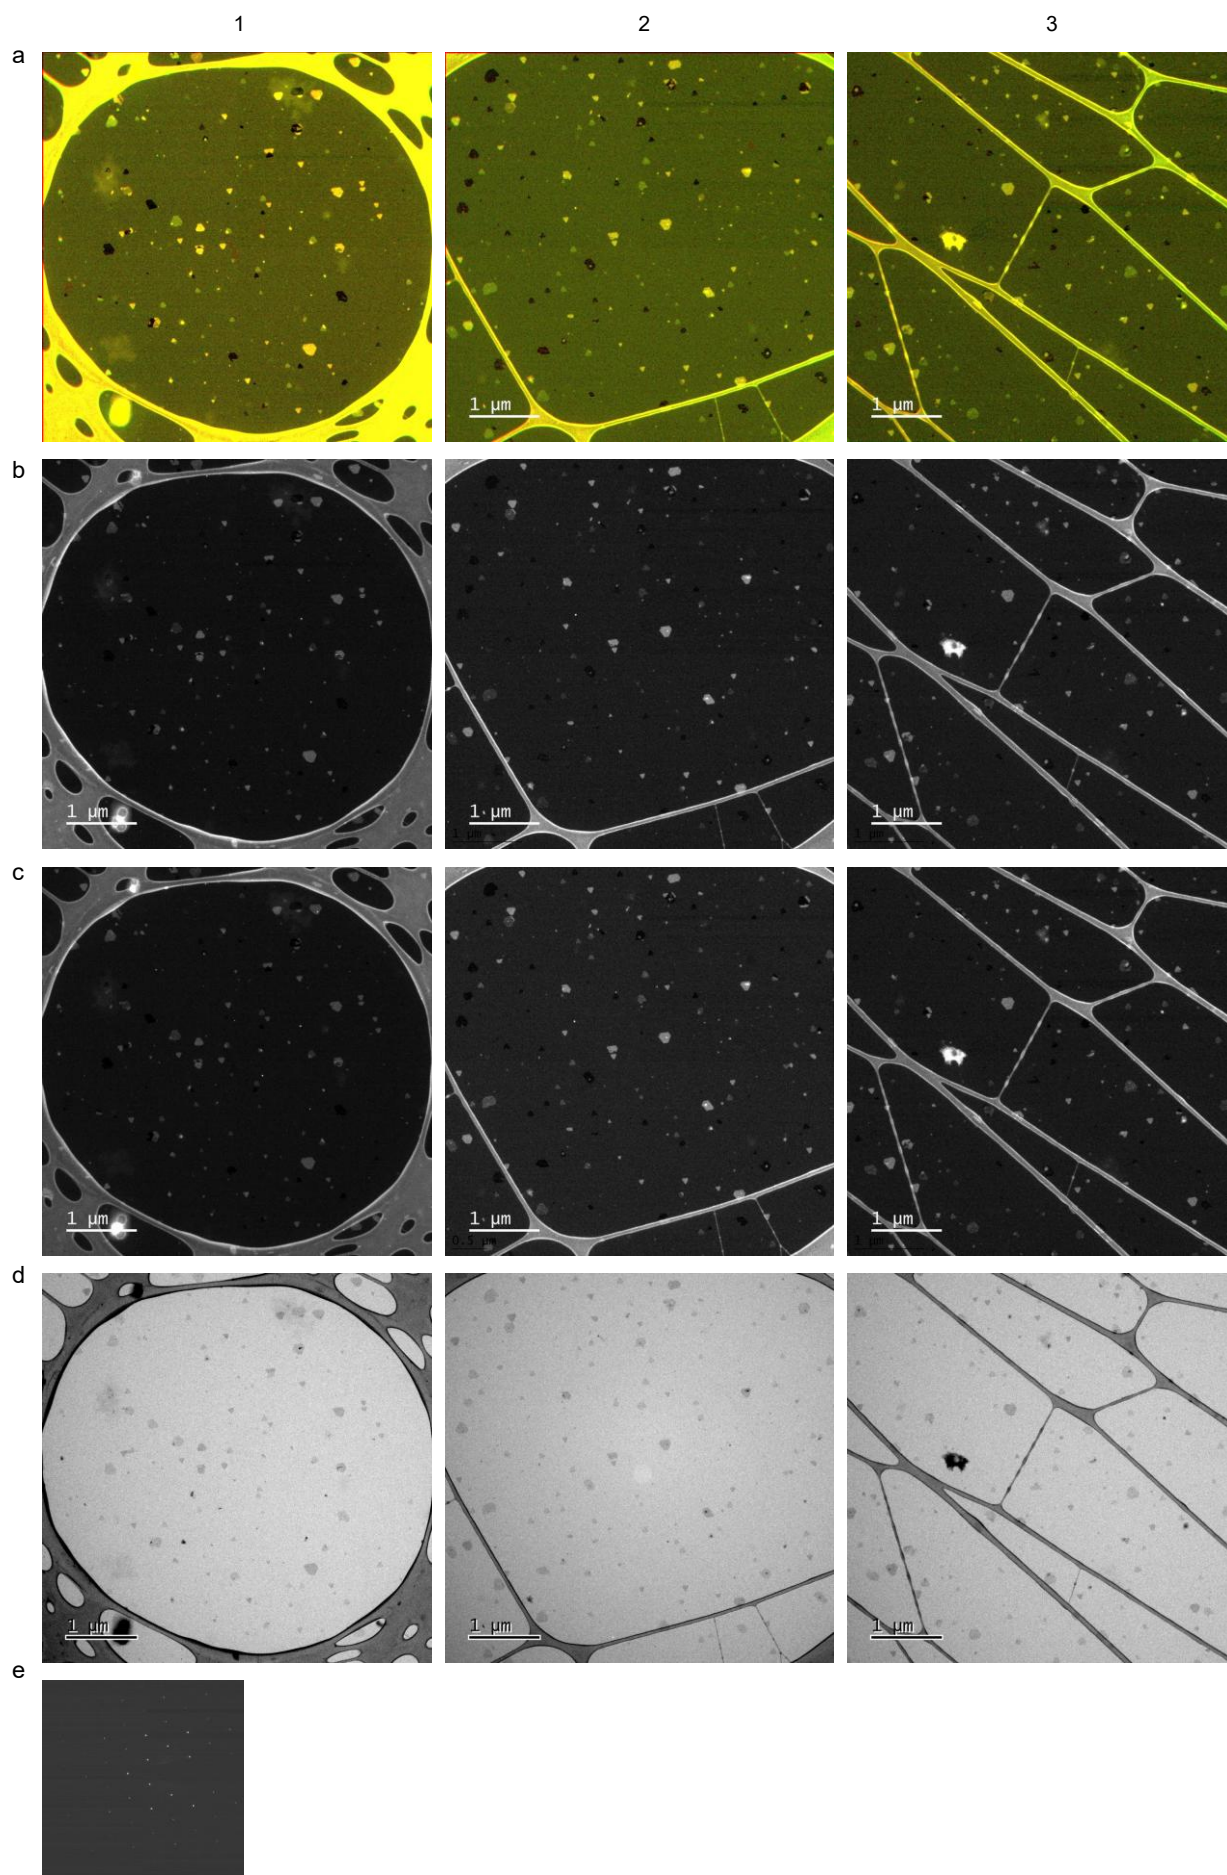

**Figure S32.** The TEM images from 3 regions for the MoS<sub>2</sub> monolayer deposited with 0.6 ppm of Mo(CO)<sub>6</sub> for 22 min, followed by 10 mins of the post-deposition annealing. The composite images with false colors (a) are composed using

310 the dark-field TEM images (b, c). The bright-field TEM images and a diffraction pattern are presented in (d) and (e),  
 311 respectively. The composite image from region 2 was used in Figure 2b.

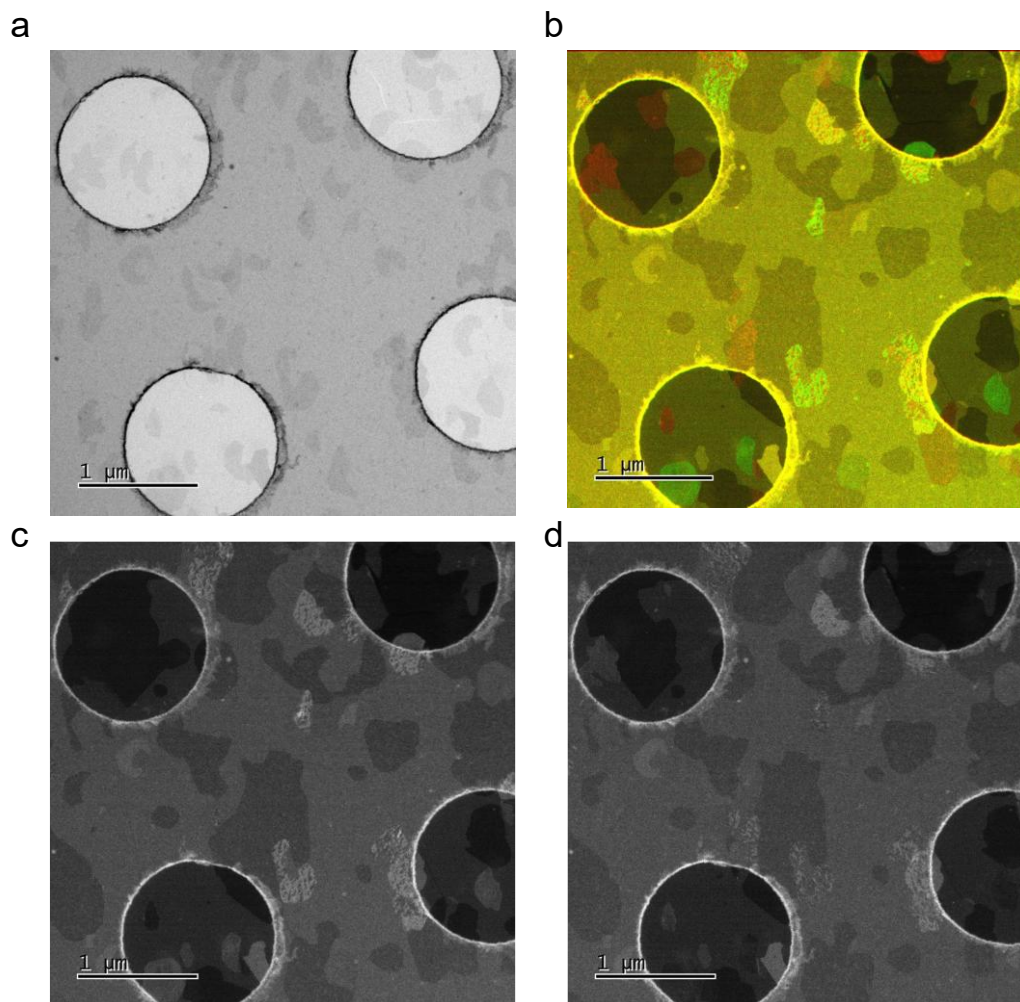

312  
 313 **Figure S33.** The TEM images of the MoS<sub>2</sub> monolayer deposited with 1.0 ppm of Mo(CO)<sub>6</sub> for 11 min, followed by 10  
 314 mins post-deposition annealing. A bright-field TEM image is shown in (a). A composite image with false colors (b) is  
 315 composed using the dark-field TEM images (c, d). The dark, bright red and green areas on the composite images  
 316 correspond to the misoriented domains. The misoriented domains can be distinguished from the secondary layer  
 317 islands by comparing the composite and the bright-field image. Only secondary layer islands are visible on the bright-  
 318 field image. The composite image was used in Figure 6a.



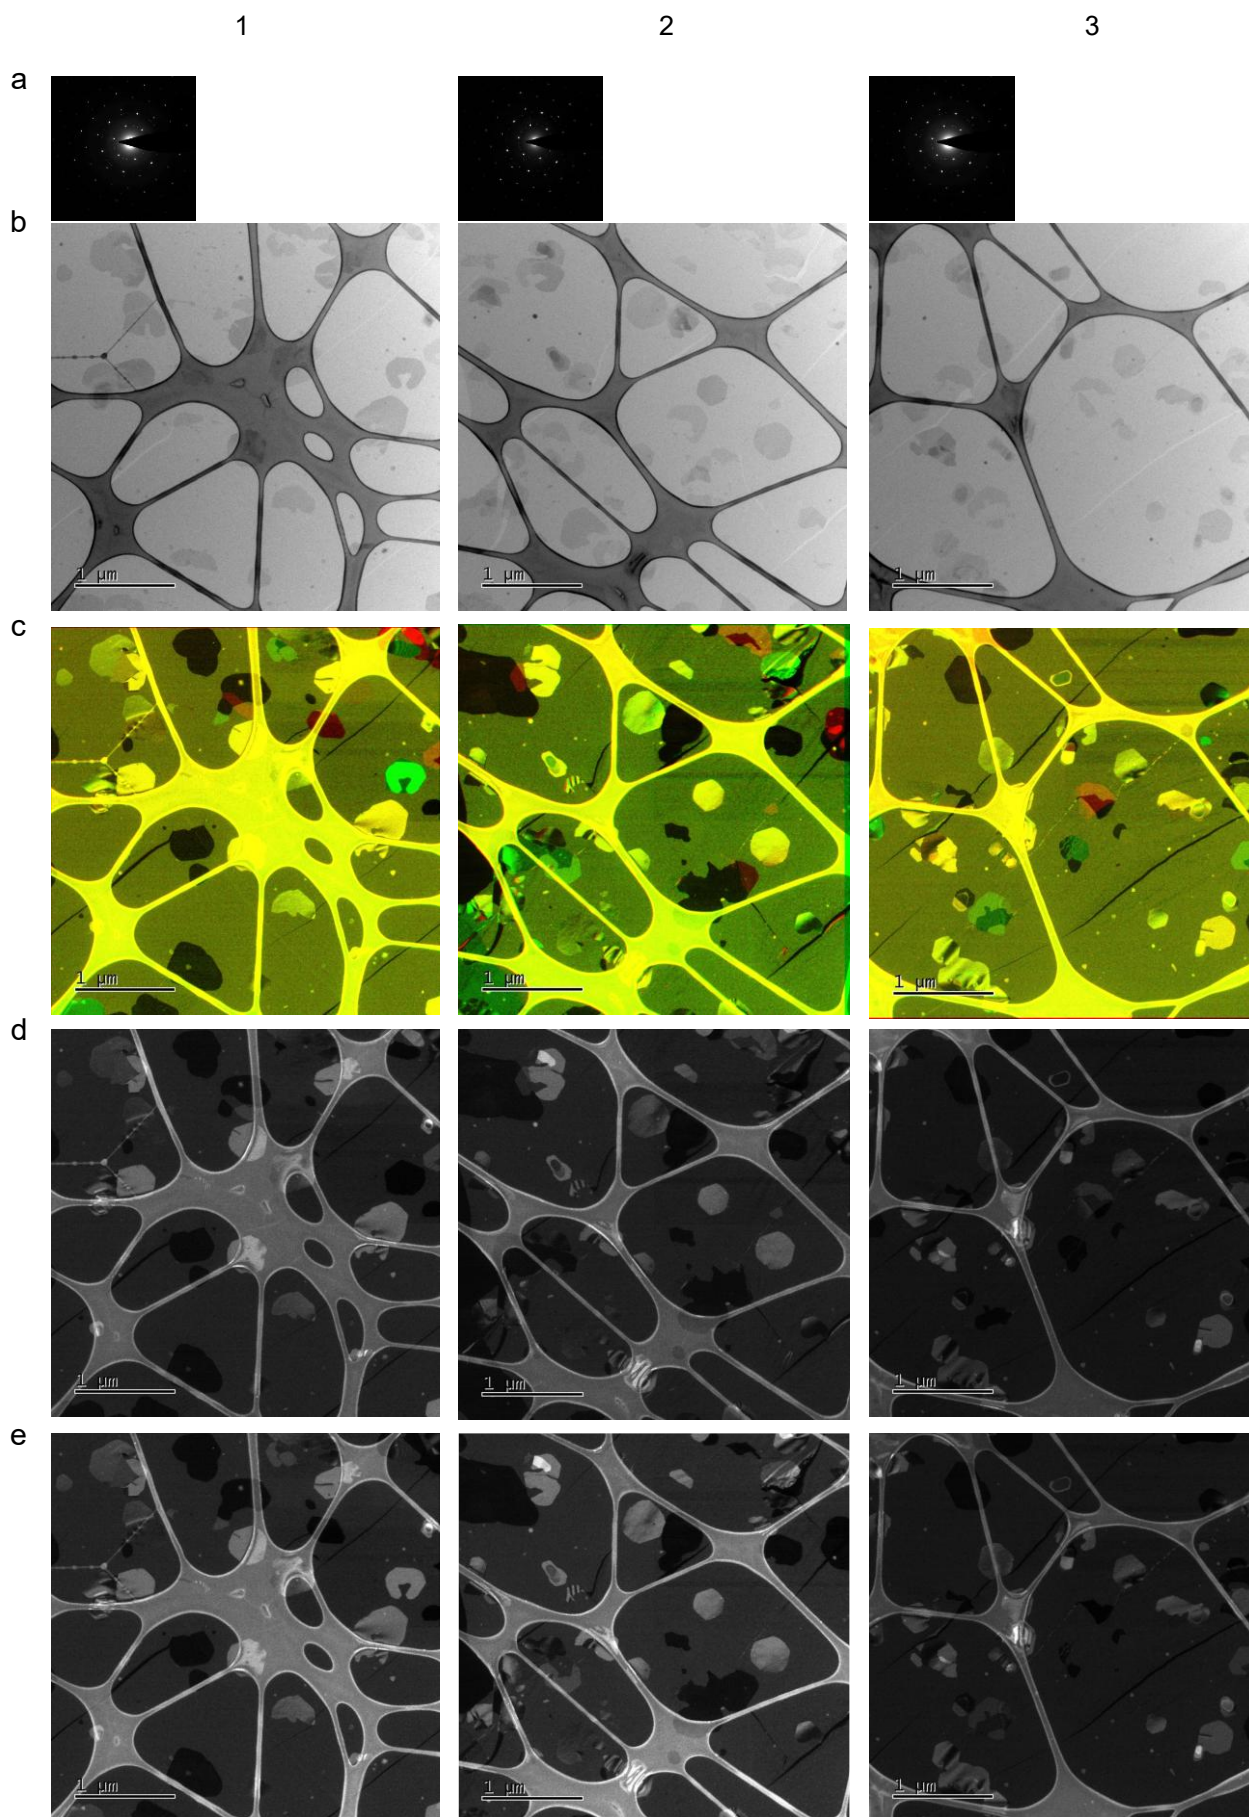

**Figure S34.** The TEM images from 3 regions for the MoS<sub>2</sub> monolayer deposited with 1.0 ppm of Mo(CO)<sub>6</sub> for 11 min, followed by 15 mins post-deposition annealing. The bright-field TEM images and the diffraction patterns are presented in (b) and (a), respectively. The composite images with false colors (c) are composed using the dark field

323 TEM images (d, e). The dark, bright red and green areas on the composite images correspond to the misoriented  
 324 domains. The misoriented domains can be distinguished from the secondary layer islands by comparing the  
 325 composite and the bright-field images. Only secondary layer islands are visible on the bright-field images. The  
 326 composite image from region 1 was used in Figure 6b.

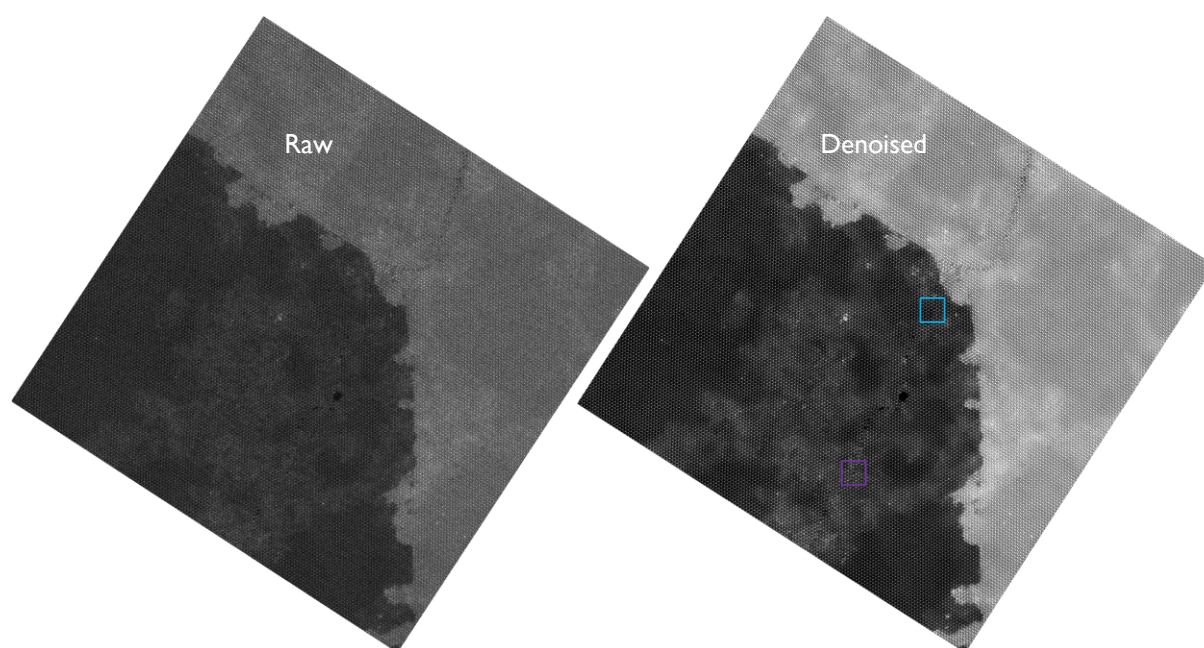

327  
 328 **Figure S35.** Large area HR-STEM images used in Figure 3e. Raw image was denoised using using trained deep learning  
 329 model.<sup>7</sup> The blue square (top) highlights  $\gamma$ -grain boundary, the violet square (bottom) highlights  $\beta$ -grain boundary.

330

331

## References

- 332 1. Palma, V. et al. H<sub>2</sub> production by thermal decomposition of H<sub>2</sub>S in the presence of oxygen. *Int J*  
 333 *Hydrogen Energy* **40**, 106–113 (2015).  
 334 2. Kang, K. et al. High-mobility three-atom-thick semiconducting films with wafer-scale homogeneity.  
 335 *Nature* **520**, 656–660 (2015).  
 336 3. Voronenkov, V., Groven, B., Medina Silva, H., Morin, P. & De Gendt, S. Guiding Principles for the  
 337 Design of a Chemical Vapor Deposition Process for Highly Crystalline Transition Metal  
 338 Dichalcogenides. *Physica Status Solidi (A) Applications and Materials Science* **221**, (2024).  
 339 4. Chernov, A. A. Modern Crystallography III. **36**, (1984).  
 340 5. Kandybka, I. et al. Chemical Vapor Deposition of a Single-Crystalline MoS<sub>2</sub> Monolayer through  
 341 Anisotropic 2D Crystal Growth on Stepped Sapphire Surface. *ACS Nano* **18**, 3173–3186 (2024).  
 342 6. Rollett, A., Rohrer, G. S. & Humphreys, J. *Recrystallization and Related Annealing Phenomena*.  
 343 *Recrystallization and Related Annealing Phenomena* (Elsevier, 2017).  
 344 doi:10.1016/j.matchar.2020.110382.  
 345 7. Lobato, I., Friedrich, T. & Van Aert, S. Deep convolutional neural networks to restore single-shot  
 346 electron microscopy images. *npj Computational Materials* 2024 10:1 **10**, 1–19 (2024).  
 347
